# Supplementary material for: The proteolysis of ZP proteins is essential to control cell membrane structure and integrity of developing tracheal tubes in Drosophila
Source: eLife journal article supplement (doi:10.7554/elife.91079), 2023-09-21
Supplement: fig1-data3 [file Figure 1_source data 5_Measuerment von bulbs_1292.xlsx]

## Sheet: Sheet1
													TEM	Confocal
Type	Name	Max. (Radius)	Min. (Radius)	Mean (Radius)	Length [nm]		Length [nm]	Mean	min	max				length nm	witdh µm		TEM
Arbitrary Line		-	-	-	269.67		269.67	243.118	62.52	441.69				760	650
Arbitrary Line		-	-	-	441.69		441.69							830	890
Arbitrary Line		-	-	-	92.86		92.86							790	790
Arbitrary Line		-	-	-	318.37		318.37							730	710
							111.16							740	730
Type	Name	Max. (Radius)	Min. (Radius)	Mean (Radius)	Length [nm]		330.13							740	700
Arbitrary Line		-	-	-	111.16		119.82
Arbitrary Line		-	-	-	330.13		135.94
Arbitrary Line		-	-	-	119.82		276.03						TEM	Confocal
Arbitrary Line		-	-	-	135.94		386.22						243.118	755	745
Arbitrary Line		-	-	-	276.03		207.29					stb	88.2188	63.3174
Arbitrary Line		-	-	-	386.22		239.39
Arbitrary Line		-	-	-	207.29		275.09
Arbitrary Line		-	-	-	239.39		330.71
Arbitrary Line		-	-	-	275.09		257.07
Arbitrary Line		-	-	-	330.71		181.88
							281.78
Type	Name	Max. (Radius)	Min. (Radius)	Mean (Radius)	Length [nm]		337.7
Arbitrary Line		-	-	-	257.07		255.49
Arbitrary Line		-	-	-	181.88		368.5
Arbitrary Line		-	-	-	281.78		227.82
Arbitrary Line		-	-	-	337.7		199.54
Arbitrary Line		-	-	-	255.49		277.94
Arbitrary Line		-	-	-	368.5		119.86
							343.55
Type	Name	Max. (Radius)	Min. (Radius)	Mean (Radius)	Length [nm]		277.8
Arbitrary Line		-	-	-	227.82		263.2
Arbitrary Line		-	-	-	199.54		244.95
							370.3
Type	Name	Max. (Radius)	Min. (Radius)	Mean (Radius)	Length [nm]		225.37
Arbitrary Line		-	-	-	277.94		263.2
Arbitrary Line		-	-	-	119.86		244.95
Arbitrary Line		-	-	-	343.55		370.3
Arbitrary Line		-	-	-	277.8		225.37
							277.89
Type	Name	Max. (Radius)	Min. (Radius)	Mean (Radius)	Length [nm]		357.78
Arbitrary Line		-	-	-	263.2		155.87
Arbitrary Line		-	-	-	244.95		271.92
Arbitrary Line		-	-	-	370.3		62.52
Arbitrary Line		-	-	-	225.37		289.82
							348.07
Type	Name	Max. (Radius)	Min. (Radius)	Mean (Radius)	Length [nm]		281
Arbitrary Line		-	-	-	263.2		244.68
Arbitrary Line		-	-	-	244.95		338.54
Arbitrary Line		-	-	-	370.3		141.78
Arbitrary Line		-	-	-	225.37		232.12
							68.15
Type	Name	Max. (Radius)	Min. (Radius)	Mean (Radius)	Length [nm]		280.54
Arbitrary Line		-	-	-	277.89		165.36
Arbitrary Line		-	-	-	357.78		278.2
Arbitrary Line		-	-	-	155.87		122.18
Arbitrary Line		-	-	-	271.92		194.51
Arbitrary Line		-	-	-	62.52		94.01
Arbitrary Line		-	-	-	289.82		246.14
Arbitrary Line		-	-	-	348.07		333.15
Arbitrary Line		-	-	-	281		229.25
							121.18
Type	Name	Max. (Radius)	Min. (Radius)	Mean (Radius)	Length [nm]		204.59
Arbitrary Line		-	-	-	244.68		302.67
Arbitrary Line		-	-	-	338.54		232.62
Arbitrary Line		-	-	-	141.78		84.7
Arbitrary Line		-	-	-	232.12
Arbitrary Line		-	-	-	68.15
Arbitrary Line		-	-	-	280.54
Type	Name	Max. (Radius)	Min. (Radius)	Mean (Radius)	Length [nm]
Arbitrary Line		-	-	-	165.36
Arbitrary Line		-	-	-	278.2
Arbitrary Line		-	-	-	122.18
Arbitrary Line		-	-	-	194.51
Type	Name	Max. (Radius)	Min. (Radius)	Mean (Radius)	Length [nm]
Arbitrary Line		-	-	-	94.01
Arbitrary Line		-	-	-	246.14
Arbitrary Line		-	-	-	333.15
Arbitrary Line		-	-	-	229.25
Arbitrary Line		-	-	-	121.18
Type	Name	Max. (Radius)	Min. (Radius)	Mean (Radius)	Length [nm]
Arbitrary Line		-	-	-	204.59
Arbitrary Line		-	-	-	302.67
Arbitrary Line		-	-	-	232.62
Arbitrary Line		-	-	-	84.7
