# Supplementary material for: The proteolysis of ZP proteins is essential to control cell membrane structure and integrity of developing tracheal tubes in Drosophila
Source: eLife journal article supplement (doi:10.7554/elife.91079), 2023-09-21
Supplement: fig2-data1 [file Figure 2_source data 4_statistics_Pio distribution.xlsx]

## Sheet: Tabelle1
												airyscan						airy
	btlG4-UASCht2																	2					3					4					5					6					7					8
	Distance [µm]	Intensity ChS1-T1-spec	Intensity Ch2-T1_uif	Intensity ChS2-T2-Pio		Distance [µm]	Intensity ChS1-T1	Intensity Ch2-T1	Intensity ChS2-T2			Distance [µm]	Intensity ChA-T1-UIF	Intensity ChA-T2-Pio	Intensity ChA-T3-Spec			Distance [µm]	Intensity ChA-T1	Intensity ChA-T2	Intensity ChA-T3		Distance [µm]	Intensity ChA-T1	Intensity ChA-T2	Intensity ChA-T3		Distance [µm]	Intensity ChA-T1	Intensity ChA-T2	Intensity ChA-T3		Distance [µm]	Intensity ChA-T1	Intensity ChA-T2	Intensity ChA-T3		Distance [µm]	Intensity ChA-T1	Intensity ChA-T2	Intensity ChA-T3		Distance [µm]	Intensity ChA-T1	Intensity ChA-T2	Intensity ChA-T3		Distance [µm]	Intensity ChA-T1
	0.000	310	25	14		0.000	754	46	66			0.000	246	188	1867			0.000	204	357	2523		0.000	281	168	8168		0.000	199	33	3319		0.000	48	0	1874		0.000	90	367	3359		0.000	40	153	2445		0.000	65
	0.092	558	79	15		0.093	539	120	59			0.046	221	172	2078			0.046	239	450	2619		0.046	234	304	10573		0.046	0	48	3684		0.046	271	0	2042		0.046	74	403	3931		0.046	32	133	2451		0.046	5
	0.184	665	375	16		0.185	545	320	85			0.092	235	96	1933			0.092	256	620	2693		0.092	104	357	11752		0.092	0	156	3716		0.092	674	0	2026		0.092	97	310	4159		0.092	0	144	2445		0.092	0
	0.276	838	272	27		0.278	650	574	94			0.138	196	43	2126			0.138	237	842	2742		0.138	10	324	12767		0.138	0	253	3895		0.138	2990	0	2312		0.138	158	330	4549		0.138	0	165	2409		0.138	0
	0.369	1221	548	55		0.371	744	1175	169			0.183	120	72	2292			0.184	188	1064	2806		0.184	0	187	13496		0.184	627	439	3762		0.184	5134	0	2513		0.184	235	404	4852		0.184	0	355	2294		0.184	0
	0.461	1605	1285	252		0.464	693	1812	248			0.229	0	88	2351			0.230	131	1243	2912		0.230	28	163	14127		0.229	2711	524	3775		0.230	9093	0	3091		0.230	445	524	5100		0.230	0	570	2250		0.230	0
	0.553	1395	1659	666		0.556	580	2325	469			0.275	0	129	2267			0.276	87	1347	3027		0.276	1365	146	12581		0.275	7352	521	4019		0.276	11468	6345	3715		0.276	1184	569	4795		0.276	13	741	2286		0.276	0
	0.645	1012	1850	1452		0.649	571	2060	866			0.321	0	130	2116			0.322	62	1368	3069		0.322	2075	314	12283		0.321	12282	694	4683		0.322	11468	6345	3715		0.323	2174	677	4602		0.322	669	892	2405		0.322	0
	0.737	1031	1596	2071		0.742	644	2166	1172			0.367	0	139	2229			0.368	118	1257	2954		0.368	4278	464	9997		0.367	13502	634	4633		0.368	11460	19066	3883		0.369	3961	734	3905		0.368	1950	1081	2574		0.368	0
	0.829	668	1531	2143		0.835	560	1595	1486			0.413	95	217	2458			0.414	172	1325	2692		0.414	5400	938	9647		0.413	19069	1531	5270		0.414	10107	30601	3750		0.415	5606	896	3727		0.414	4020	1255	2721		0.414	0
	0.922	629	1282	1683		0.927	783	1323	1450			0.458	1886	584	3739			0.460	487	1484	2491		0.460	9584	1947	8113		0.459	21045	3440	5565		0.460	9194	32108	3427		0.461	5964	737	3396		0.460	6849	1319	2773		0.460	0
	1014	526	1169	1124		1020	422	1122	1511			0.504	3614	632	4152			0.506	1322	1687	2450		0.505	13074	3433	7422		0.505	20540	8939	5142		0.506	8503	31944	3540		0.507	7513	994	3427		0.506	10135	1460	2694		0.506	172
	1106	376	1275	795		1113	622	784	1769			0.550	8566	820	5456			0.552	2912	1932	2505		0.551	13823	4683	7222		0.551	17108	12981	4460		0.552	7775	25921	2930		0.553	8940	1282	3235		0.552	13353	2357	2507		0.552	793
	1198	411	817	671		1206	407	607	2319			0.596	11453	1212	6764			0.598	5332	2405	2489		0.597	14135	9313	6396		0.597	12584	20177	3773		0.598	6537	14098	2166		0.599	9799	1693	3397		0.598	15278	4662	2091		0.599	2035
	1290	367	916	594		1298	347	790	2265			0.642	14214	1251	6115			0.644	8397	3428	2307		0.643	14135	9313	6396		0.643	8910	20123	3249		0.644	5682	6680	1610		0.645	10389	2084	3532		0.644	16394	8889	2154		0.645	4020
	1382	207	747	493		1391	286	547	1676			0.688	17916	2613	5934			0.690	12291	4734	1847		0.689	11897	16754	5734		0.688	8346	23547	3019		0.690	5682	6680	1610		0.691	10504	3062	3594		0.690	16315	13800	2422		0.691	6670
	1474	193	676	371		1484	306	586	1065			0.734	18125	4823	5253			0.736	14907	6998	1636		0.735	8500	22613	5164		0.734	6054	20767	2672		0.736	5171	6199	1400		0.737	10490	3234	3615		0.736	15389	17363	2908		0.737	9654
	1567	333	818	367		1577	232	504	671			0.779	16283	9933	4186			0.782	16375	9719	1487		0.781	7532	19754	5194		0.780	4577	19739	2608		0.782	4661	7501	1349		0.783	10234	4187	3618		0.782	14161	17936	3572		0.783	12415
	1659	323	433	347		1669	289	465	564			0.825	16283	9933	4186			0.828	16421	12370	1382		0.827	4831	18670	4430		0.826	4265	16864	2767		0.828	4244	7034	1334		0.829	9811	4166	3683		0.828	13113	15442	4318		0.829	14336
	1751	274	501	474		1762	302	304	432			0.871	12420	14580	3085			0.874	15155	14329	1317		0.873	4831	18670	4430		0.872	4081	17058	2669		0.874	3505	4363	1332		0.875	9793	5128	3732		0.874	12473	11442	4980		0.875	14974
	1843	287	578	611		1855	278	305	432			0.917	8905	14793	2557			0.920	13007	15306	1301		0.919	3572	17724	3569		0.918	3911	14267	2464		0.920	3202	3352	1344		0.922	9793	5128	3732		0.920	12186	8061	5327		0.921	14257
	1935	259	431	673		1948	269	350	437			0.963	7590	14256	2415			0.966	10542	15611	1324		0.965	3448	18737	3362		0.964	3945	16388	2302		0.966	2933	2151	1334		0.968	10324	7485	3580		0.966	12051	6678	5198		0.967	12520
	2027	323	585	704		2040	186	509	565			1009	6268	7097	2234			1012	8310	12302	1377		1011	3277	23130	2762		1010	3707	17204	2316		1012	2740	2084	1357		1014	10718	12142	3239		1012	11882	7346	4713		1013	10327
	2119	280	423	719		2133	303	446	738			1054	6268	7097	2234			1058	6501	12686	1489		1057	3219	24970	2603		1056	3256	15691	2336		1058	2801	3814	1521		1060	11241	18732	2890		1058	11858	9182	4161		1059	8220
	2212	286	491	697		2226	303	446	738			1100	5706	1652	2033			1104	5108	13011	1610		1103	3205	27436	2550		1101	3026	19678	2218		1104	2801	3814	1521		1106	11683	28422	2394		1104	11161	10811	3754		1105	6535
	2304	184	400	729		2319	346	538	1208			1146	5184	790	1766			1150	4110	13081	1669		1149	3140	22204	2437		1147	2769	15772	2084		1150	2915	5953	1554		1152	11282	32765	2216		1150	10358	11722	3564		1151	5378
	2396	253	164	797		2411	270	402	1561			1192	4610	2699	1511			1196	3458	12844	1595		1195	3101	23235	2313		1193	2655	16205	2077		1196	2970	6949	1396		1198	10443	35024	1881		1196	9559	11730	3490		1197	4698
	2488	254	406	763		2504	244	354	1573			1238	4053	7669	1462			1242	3093	12424	1423		1241	2952	14757	2260		1239	2473	8953	1986		1242	2735	5034	1286		1244	9035	29955	1679		1242	8796	10907	3443		1243	4371
	2580	108	527	1014		2597	262	358	1290			1284	3707	10312	1403			1288	2941	11905	1294		1287	2919	14067	2220		1285	2505	12676	1948		1288	2920	6615	1363		1290	7588	24121	1644		1288	8062	9425	3329		1289	4234
	2672	108	527	1014		2690	245	378	1305			1330	3566	14600	1472			1335	2918	14520	1348		1333	2722	4936	2070		1331	2331	6332	1781		1334	2632	5314	1334		1336	6323	18986	1574		1334	7363	7457	3068		1335	4118
	2765	180	224	1467		2782	261	312	1522			1375	3247	21829	1586			1381	2928	14133	1386		1379	2492	644	1917		1377	2210	6355	1663		1380	2639	5149	1338		1382	6155	20154	1637		1380	6756	5175	2726		1381	3896
	2857	214	303	1795		2875	349	377	1609			1421	3005	21129	1531			1427	2921	12128	1375		1424	2487	2130	1972		1423	2053	6187	1567		1426	2781	4431	1224		1428	5260	20586	1632		1426	6308	2880	2481		1427	3543
	2949	199	243	1475		2968	265	383	1488			1467	2859	23611	1543			1473	2854	8970	1309		1470	2328	6677	2052		1469	1934	8530	1465		1472	2781	4431	1224		1474	4804	23321	1725		1472	6030	1151	2386		1473	3141
	3041	169	358	1486		3061	172	537	1339			1513	2767	18965	1413			1519	2722	5893	1255		1516	2359	7872	2160		1515	1856	7204	1407		1518	2897	3522	1149		1521	4529	25981	1976		1519	5603	2572	1920		1519	2819
	3133	247	231	1346		3153	269	349	1186			1559	2798	21289	1466			1565	2556	4143	1230		1562	2332	12053	2135		1560	1879	7842	1287		1564	2897	2716	1149		1567	4596	24873	2109		1565	5512	4346	1837		1565	2667
	3225	104	274	1037		3246	213	482	1103			1605	2770	14835	1295			1611	2403	4149	1191		1608	2237	11303	2039		1606	1881	5024	1289		1610	2791	2912	1136		1613	4619	16007	2029		1611	5378	7984	1740		1611	2699
	3317	149	246	649		3339	153	514	1323			1650	2768	10758	1230			1657	2291	5349	1128		1654	2237	11303	2039		1652	1888	2896	1439		1656	2701	2311	1212		1659	4500	10986	1938		1657	5214	11793	1612		1657	2858
	3410	208	332	619		3432	153	514	1323			1696	2722	11487	1199			1703	2220	6526	1022		1700	2108	6548	1914		1698	1763	3756	1472		1702	2766	2188	1304		1705	4173	4887	1619		1703	5050	13734	1446		1704	3063
	3502	210	300	664		3524	204	488	1542			1742	2726	16006	1223			1749	2149	7872	1080		1746	2186	3441	1785		1744	1655	4557	1407		1748	2691	2253	1311		1751	3880	4420	1524		1749	4884	12679	1302		1750	3242
	3594	112	289	760		3617	237	630	1631			1788	2651	15100	1224			1795	2057	9143	1167		1792	2295	2144	1738		1790	1441	7666	1404		1794	2702	3021	1212		1797	3674	3336	1601		1795	4690	9121	1245		1796	3351
	3686	223	430	829		3710	164	486	1522			1834	2628	20172	1266			1841	1940	10156	1224		1838	2485	2921	1871		1836	1365	7556	1369		1840	2652	5366	1067		1843	3674	3336	1601		1841	4463	4745	1247		1842	3375
	3778	137	195	821		3803	310	572	1251			1880	2474	19261	1132			1887	1812	10621	1243		1884	2368	3092	1690		1882	1336	8083	1378		1886	2652	5366	1067		1889	3586	1884	1706		1887	4241	1285	1235		1888	3324
	3870	155	461	620		3895	176	460	780			1926	2346	13559	1014			1933	1695	10285	1245		1930	2291	5105	1542		1928	1327	6233	1355		1932	2577	9158	1065		1935	3516	2167	1719		1933	4078	0	1197		1934	3211
	3963	194	307	396		3988	380	411	682			1971	2366	12131	1012			1979	1601	9182	1227		1976	2304	7631	1500		1973	1363	3616	1384		1978	2493	12274	1121		1981	3487	3758	1724		1979	3808	0	1159		1980	3044
	4055	326	190	335		4081	346	394	746			2017	2276	6682	1009			2025	1655	7813	1177		2022	2241	11158	1483		2019	1440	2326	1390		2024	2491	10017	1109		2027	3364	5456	1670		2025	3831	819	1229		2026	2839
	4147	201	370	494		4174	241	487	714			2063	2298	4862	1005			2071	1620	6217	1093		2068	2269	15232	1534		2065	1513	2267	1271		2070	2368	12847	1146		2073	3327	9312	1661		2071	3891	3228	1325		2072	2638
	4239	108	234	572		4266	310	613	616			2109	2185	2546	1031			2117	1592	4895	1010		2114	2313	19961	1696		2111	1623	4123	1202		2116	2262	10202	1139		2120	3146	11930	1613		2117	3912	5787	1404		2118	2502
	4331	211	220	650		4359	344	532	492			2155	2059	2931	989			2163	1583	3979	970		2160	2313	19961	1696		2157	1594	4203	1265		2162	2054	9258	1160		2166	3055	15700	1702		2163	3832	7681	1419		2164	2468
	4423	220	403	587		4452	360	483	727			2201	2001	3516	1004			2209	1603	3415	973		2206	2304	24063	1808		2203	1654	6581	1273		2208	1908	8557	1221		2212	2956	15644	1770		2209	3652	8490	1377		2210	2511
	4515	130	164	471		4545	271	463	749			2246	1862	3658	986			2255	1640	3108	1001		2252	2282	26393	1871		2249	1628	9129	1333		2254	1662	9207	1354		2258	2894	18280	1869		2255	3437	8402	1333		2256	2561
	4608	127	203	414		4637	220	387	906			2292	1862	3658	986			2301	1652	2959	1037		2298	2349	26829	1850		2295	1634	12071	1350		2300	1784	9421	1265		2304	2921	13821	1800		2301	3264	7949	1307		2302	2560
	4700	203	268	340		4730	224	429	724			2338	1730	3907	920			2347	1605	2483	1041		2344	2425	26955	1872		2341	1762	15332	1390		2346	1678	11751	1257		2350	2866	15570	1878		2347	3146	7561	1277		2348	2514
	4792	194	392	342		4823	245	426	330			2384	1675	3651	914			2393	1516	2354	1021		2389	2513	25610	2020		2386	1890	20299	1274		2392	1520	13666	1340		2396	2849	15731	1901		2393	3034	7344	1248		2394	2468
	4884	193	397	395		4916	311	593	270			2430	1525	4203	1122			2439	1402	2127	925		2435	2553	26605	1921		2432	1890	20299	1274		2438	1510	14208	1437		2442	2789	12602	1814		2439	2913	3803	1310		2440	2449
	4976	273	342	396		5008	245	430	253			2476	1387	8074	1284			2485	1295	1859	770		2481	2656	24080	1970		2478	1988	24339	1224		2484	1586	12947	1374		2488	2821	11148	1906		2485	2748	4398	1256		2486	2431
	5068	151	384	300		5101	240	719	378			2522	1387	8074	1284			2531	1213	1662	634		2527	2814	21421	1692		2524	2095	26318	1184		2530	1617	12403	1428		2534	2802	7985	1831		2531	2589	4977	1149		2532	2365
	5161	99	302	320		5194	315	683	416			2567	1312	15485	1304			2577	1157	1584	575		2573	2922	16941	1440		2570	2226	26751	1333		2576	1958	9885	1378		2580	2808	7164	1936		2577	2490	5482	1056		2578	2223
	5253	290	359	326		5287	261	972	524			2613	1246	20417	1253			2623	1125	1567	585		2619	2977	12386	1498		2616	2345	27815	1403		2622	2560	7881	1256		2626	2728	5395	1877		2623	2450	5967	1052		2624	2031
	5345	146	284	393		5379	315	689	774			2659	1200	28097	1192			2669	1183	1741	629		2665	2977	11395	1448		2662	2350	28567	1341		2668	2560	7881	1256		2672	2651	7252	1838		2669	2432	6515	1128		2670	1841
	5437	128	456	486		5472	186	746	1210			2705	1163	32468	1310			2715	1154	1780	681		2711	3027	7787	1619		2708	2321	29628	1451		2714	3329	6544	1083		2719	2393	7506	1765		2715	2415	7233	1211		2716	1707
	5529	86	268	488		5565	364	1188	1318			2751	1163	32468	1310			2761	1123	1983	737		2757	3161	5899	1648		2754	2336	29453	1351		2760	4092	5767	1091		2765	2393	7506	1765		2761	2409	8276	1248		2762	1658
	5621	233	482	464		5658	281	810	1105			2797	1150	33455	1293			2807	1090	2436	760		2803	3358	6144	1658		2800	2294	29569	1492		2806	4507	5753	1201		2811	2206	8740	1841		2807	2432	9740	1247		2809	1688
	5713	146	341	429		5750	276	1423	680			2842	1133	31304	1241			2853	1057	3061	707		2849	3523	5620	1768		2845	2201	27673	1388		2852	5126	6086	1361		2857	1988	6460	1711		2853	2471	11466	1252		2855	1767
	5806	308	587	408		5843	276	1423	680			2888	1231	21590	1155			2899	1019	3598	625		2895	3756	5458	2152		2891	2009	23905	1315		2898	5126	6086	1361		2903	1894	5467	1757		2899	2519	15860	1376		2901	1856
	5898	247	501	359		5936	457	1635	486			2934	1434	10311	1205			2945	967	3770	619		2941	3756	5458	2152		2937	1854	18071	1363		2944	5683	6525	1466		2949	1941	2760	1780		2945	2559	16758	1460		2947	1935
	5990	211	503	390		6028	560	2075	333			2980	1434	10311	1205			2991	901	3482	725		2987	4008	4716	2490		2983	1779	15258	1369		2990	6071	6052	1613		2995	1983	2538	1914		2991	2587	16892	1466		2993	2004
	6082	181	582	448		6121	618	2010	142			3026	1597	6321	1212			3037	825	3807	868		3033	4357	5381	2553		3029	1779	15258	1369		3036	6079	5426	1674		3041	2008	2799	2009		3037	2625	15741	1340		3039	2068
	6174	213	547	438		6214	858	716	69			3072	1553	8194	1129			3083	800	2951	956		3079	4630	4761	2554		3075	1778	14115	1293		3082	5924	5186	1619		3087	2023	3623	1953		3083	2687	12951	1173		3085	2101
	6266	258	921	490		6307	711	333	22			3117	1472	15490	947			3129	789	2293	913		3125	4873	5629	2590		3121	1827	13921	1292		3128	5093	4943	1502		3133	1920	4512	1842		3129	2757	9059	1101		3131	2066
	6358	229	543	488		6399	581	166	12			3163	1390	18655	905			3175	779	2274	784		3171	4873	5629	2590		3167	1941	13925	1412		3174	4508	5389	1605		3179	1864	4149	1637		3175	2805	5773	1154		3177	1943
	6451	211	628	575		6492	585	238	21			3209	1382	19359	1010			3221	764	2954	677		3217	5114	8554	2564		3213	2234	13300	1432		3220	3302	5140	1756		3225	1864	4149	1637		3221	2809	5173	1271		3223	1773
	6543	316	650	842		6585	645	184	21			3255	1374	19117	1068			3267	760	3851	668		3263	5221	10831	2433		3258	2552	10287	1392		3266	2677	4667	1792		3271	1861	3259	1585		3267	2769	8245	1377		3269	1632
	6635	234	808	942								3301	1494	14676	1168			3313	783	4313	749		3309	5565	13506	2216		3304	2783	9132	1274		3312	2291	4364	1842		3318	1889	2635	1587		3313	2699	13908	1393		3315	1592
	6727	188	723	891								3347	1659	8300	1323			3359	904	3360	828		3354	5703	12791	2186		3350	2788	7284	1215		3358	1688	3717	1809		3364	2091	2162	1698		3359	2621	11592	1233		3361	1662
	6819	317	863	970								3393	1831	5357	1322			3405	955	2912	903		3400	6173	14940	2272		3396	2844	7454	1142		3404	1458	3240	1699		3410	2183	3602	1774		3405	2561	13412	991		3407	1791
	6911	246	1425	1185								3438	1929	4272	1126			3451	999	2713	926		3446	6573	19250	2599		3442	2746	9342	1274		3450	1427	2892	1611		3456	2286	4929	1747		3451	2556	12282	825		3453	1893
	7004	236	1839	1219								3484	1915	6737	1095			3497	1036	2841	925		3492	6642	17923	2672		3488	2577	13553	1467		3496	1373	2891	1529		3502	2294	7918	1783		3497	2615	8947	846		3499	1911
	7096	322	1916	1107								3530	1937	6603	1034			3543	1064	3014	917		3538	7337	20296	3164		3534	2430	15156	1446		3542	1234	2859	1404		3548	2178	9372	1604		3543	2718	5221	977		3545	1846
	7188	509	1707	742								3576	1819	11290	1069			3589	1076	3009	914		3584	7739	21003	3281		3580	2106	14324	1396		3588	1126	2883	1515		3594	2060	12832	1405		3589	2819	2710	1087		3591	1751
	7280	769	2003	473								3622	1683	11862	1106			3635	1069	2876	929		3630	9643	25549	3508		3626	2106	14324	1396		3634	870	2603	1563		3640	1913	16951	1190		3635	2881	1898	1149		3637	1685
	7372	812	2192	276								3668	1547	14717	1142			3681	1030	2960	1033		3676	10835	26715	3509		3672	1777	11818	1351		3680	870	2603	1563		3686	1792	16983	967		3681	2904	2187	1208		3683	1671
	7464	942	2452	205								3713	1541	15023	1163			3727	1038	2977	981		3722	12537	31366	3530		3717	1589	10256	1381		3726	613	2306	1570		3732	1792	16983	967		3727	2915	2641	1258		3729	1692
	7556	960	1748	77								3759	1474	13585	1144			3773	1054	3108	906		3768	15994	33536	3668		3763	1546	14429	1497		3772	415	2381	1603		3778	1766	15571	1029		3773	2933	2694	1268		3775	1723
	7649	1533	1490	58								3805	1398	11333	1099			3819	1066	3165	871		3814	17958	31288	3816		3809	1731	19174	1490		3818	410	2233	1636		3824	1711	19514	1161		3819	2939	2808	1248		3821	1769
	7741	1475	486	47								3851	1291	10964	1123			3865	1059	3014	880		3860	18739	19752	3891		3855	1971	25755	1614		3864	339	2724	1664		3871	1573	17625	1094		3865	2969	2165	1402		3867	1848
	7833	959	206	33								3897	1189	11395	1219			3911	1034	2638	869		3906	17640	11994	4211		3901	2233	28594	1582		3910	390	3271	1782		3917	1506	20667	1055		3911	3001	1603	1614		3913	1963
	7925	555	235	20								3943	1189	11395	1219			3958	1001	2165	813		3952	15523	6800	4334		3947	2135	26824	1567		3956	473	3536	1870		3963	1402	15982	1039		3957	3056	1254	1793		3960	2084
												3989	1175	12310	1239			4004	984	1195	843		3998	9490	393	5274		3993	2262	25377	1476		4002	486	3716	1691		4009	1440	15911	1009		4003	3133	1375	1889		4006	2178
												4034	1150	13012	1240			4050	974	1484	934		4044	6307	0	6018		4039	2138	17520	1503		4048	401	3406	1615		4055	1460	10425	918		4049	3211	2369	1898		4052	2240
												4080	927	17713	1251			4096	1001	2307	1057		4090	2008	0	7451		4085	1962	9045	1597		4094	455	3389	1460		4101	1545	10291	822		4095	3271	4356	1828		4098	2278
												4126	756	17864	1308			4142	1039	3371	1079		4136	897	99	7981		4130	2024	8069	1568		4141	463	2923	1523		4147	1654	10125	821		4141	3328	6730	1704		4144	2288
												4172	545	19317	1420			4188	1054	4194	976		4182	385	259	9288		4176	2058	6308	1417		4187	489	2531	1591		4193	1716	11282	831		4187	3427	8398	1584		4190	2258
												4218	613	16224	1405			4234	1036	4381	853		4228	185	290	9074		4222	2058	6308	1417		4233	706	2396	1712		4239	1882	11854	885		4233	3591	8656	1510		4236	2204
												4264	524	13805	1317			4280	1009	4003	809		4273	218	244	8897		4268	2191	11062	1322		4279	502	2626	1681		4285	2121	15831	916		4279	3698	5241	1551		4282	2191
												4309	452	15013	1274			4326	1006	3780	842		4319	179	141	7571		4314	2477	17743	1338		4325	502	3068	1841		4331	2243	14455	873		4325	3918	4278	1512		4328	2292
												4355	490	15880	1258			4372	1015	4542	775		4365	72	78	5888		4360	2531	25825	1477		4371	690	2961	1911		4377	2208	16241	879		4371	4081	3478	1515		4374	2522
												4401	553	19679	1422			4418	1054	7250	899							4406	2663	29660	1698		4417	656	2371	1646		4423	2138	13127	828		4417	4182	2702	1556		4420	2817
												4447	541	19078	1303			4464	1109	11708	1001							4452	2732	28515	1804		4463	656	2371	1646		4470	1855	10064	958		4463	4262	1808	1580		4466	3088
												4493	558	22720	1262			4510	1178	16932	1040							4498	2835	26402	1803		4509	677	1686	1521		4516	1805	7239	974		4510	4378	904	1557		4512	3301
												4539	602	25061	1330			4556	1254	21627	1039							4544	2789	22157	1699		4555	681	1607	1704		4562	1784	5691	1030		4556	4563	309	1544		4558	3483
												4585	659	22564	1309			4602	1324	24805	1053							4589	2785	19022	1558		4601	861	1498	1827		4608	1829	4167	1178		4602	4800	519	1628		4604	3669
												4630	685	19011	1321			4648	1368	26140	1089							4635	2696	12119	1432		4647	563	1563	1912		4654	1829	4167	1178		4648	5040	2225	1824		4650	3853
												4676	682	17681	1296			4694	1329	26666	1069							4681	2796	6906	1361		4693	459	1245	1794		4700	1913	4349	1245		4694	5221	6040	2029		4696	3997
												4722	619	13019	1318			4740	1328	26757	1088							4727	2868	5602	1371		4739	682	1256	1704		4746	1859	5929	1246		4740	5013	13622	2086		4742	4093
												4768	514	10348	1439			4786	1321	26445	1088							4773	2935	4231	1540		4785	920	1364	1723		4792	1906	5845	1370		4786	5054	19670	2017		4788	4192
												4814	515	11180	1418			4832	1304	26055	1076							4819	2935	4231	1540		4831	1425	1329	2024		4838	1858	5840	1365		4832	5125	24315	1940		4834	4386
												4860	564	10417	1262			4878	1266	25618	1060							4865	2706	6413	1649		4877	1425	1329	2024		4884	1823	4410	1380		4878	5301	26394	2008		4880	4753
												4905	623	13320	1235			4924	1217	25115	1047							4911	2534	12967	1686		4923	1930	913	2118		4930	1804	3527	1302		4924	5675	25710	2210		4926	5316
												4951	670	12438	1086			4970	1184	24737	1033							4957	2445	17253	1664		4969	2186	536	2002		4976	1807	2784	1235		4970	6364	23117	2432		4972	6043
												4997	741	11680	1087			5016	1149	23526	934							5002	2473	23096	1596		5015	2183	608	1887		5022	1654	3785	1218		5016	7484	20148	2648		5018	6861
												5043	798	7970	1245			5062	1197	22888	830							5048	2644	17861	1554		5061	2310	666	2039		5069	1613	4522	1258		5062	9106	18304	2958		5065	7697
												5089	739	3253	1295			5108	1258	22038	760							5094	2741	15764	1678		5107	2580	1035	2080		5115	1508	5413	1248		5108	11179	18234	3461		5111	8513
												5135	768	0	1287			5154	1303	20273	773							5140	2950	9701	1693		5153	2825	1007	1891		5161	1528	6048	1353		5154	13470	19331	4135		5157	9308
												5181	768	0	1287			5200	1312	17395	831							5186	3158	7929	1702		5199	3132	655	1808		5207	1651	6287	1500		5200	14260	21881	4549		5203	10070
												5226	775	0	1201			5246	1284	13766	836							5232	3536	4766	1790		5245	3132	655	1808		5253	1816	5652	1520		5246	16177	20737	5021		5249	10688
												5272	815	0	1257			5292	1241	9964	765							5278	3734	3825	2023		5291	3103	453	1959		5299	1929	7999	1652		5292	17177	17258	5265		5295	10931
												5318	788	778	1435			5338	1190	5137	659							5324	3874	4071	2131		5337	2828	929	2231		5345	2002	7297	1611		5338	16842	12431	5363		5341	10540
												5364	959	3324	1517			5384	1201	3325	621							5370	3835	3594	2145		5383	2697	1350	2277		5391	2018	6411	1532		5384	15083	7644	5436		5387	9390
												5410	959	3324	1517			5430	1208	2955	644							5416	3835	3594	2145		5429	2514	1552	2278		5437	1991	9700	1422		5430	12207	3955	5527		5433	7597
												5456	1209	4381	1488			5476	1199	3763	714							5461	3724	5659	2154		5475	2246	1167	2392		5483	1911	7309	1379		5476	8818	1685	5538		5479	5498
												5501	1115	2023	1374			5522	1177	4847	828							5507	3539	7398	2120		5521	2400	1142	2360		5529	1701	6223	1205		5522	5584	536	5308		5525	3499
												5547	1411	1415	1408			5568	1155	5277	927							5553	3540	10681	2222		5567	2381	1409	2422		5575	1701	6223	1205		5568	3011	44	4782		5571	1915
												5593	1744	1570	1575			5614	1151	4723	919							5599	3616	11490	2192		5613	2464	2230	2398		5621	1476	3542	1067		5614	1311	0	4119		5617	882
												5639	1744	1570	1575			5660	1166	3545	812							5645	3833	12077	2327		5659	2464	2230	2398		5668	1424	2037	968		5660	768	417	3760		5663	353
												5685	2028	3046	1706			5706	1262	3900	766							5691	3975	10918	2348		5705	2565	2419	2396		5714	1417	4464	1086		5706	180	1056	3331		5709	171
												5731	1954	3855	1650			5752	1362	2373	747							5737	3933	11865	2438		5751	2608	1937	2358		5760	1606	5671	1167		5752	66	1608	3092		5755	155
												5777	2066	5241	1664			5798	1512	1651	741							5783	4059	10725	2439		5797	2849	2438	2248		5806	1847	9218	1406		5798	153	1826	2937		5801	174
												5822	2096	5025	1842			5844	1685	1581	738							5829	4239	10298	2541		5843	2600	1982	2306		5852	2192	7795	1399							5847	171
												5868	2096	5025	1842			5890	1829	1795	762							5874	4895	8942	2704		5889	2571	3152	2318		5898	2488	5695	1390							5893	147
												5914	2128	3840	1911			5936	1891	1989	795							5920	5270	8067	2722		5935	2626	3910	2236		5944	2854	4321	1267							5939	119
												5960	2080	2266	1941			5982	1862	2095	802							5966	6516	7982	2700		5981	2707	4081	2218		5990	2953	3879	1226							5985	94
												6006	2156	1771	2085			6028	1783	2597	836							6012	6516	7982	2700		6027	2831	3328	2191		6036	3174	3650	1145							6031	71
												6052	2303	1460	2262			6074	1714	2923	834							6058	7747	9635	2851		6073	3266	3165	2112		6082	3206	4971	1166
												6097	2571	1285	2098			6120	1673	3142	857							6104	7857	11694	2765		6119	4186	3403	2055		6128	3421	5860	1208
												6143	2632	870	2150			6166	1648	3180	888							6150	8784	11934	2956		6165	4517	3664	2251		6174	3380	7252	1218
												6189	3014	530	1925			6212	1628	3031	922							6196	9142	10758	3235		6211	5198	5279	2397		6220	3471	5569	1244
												6235	3584	299	1684			6258	1632	2812	937							6242	9396	6354	3761		6257	5567	6204	2371		6267	3409	4452	1294
												6281	3900	1162	1607			6304	1699	2728	906							6288	9396	6354	3761		6303	5806	4644	2436		6313	3404	2787	1353
												6327	4456	3516	1644			6350	1899	3024	873							6333	8384	2659	4121		6349	6992	2768	2637		6359	3643	1813	1412
												6373	4648	4406	1788			6396	2117	3458	895							6379	7409	1492	4262		6395	9161	3426	2818		6405	3703	1318	1452
												6418	4741	7491	1992			6442	2338	3821	936							6425	5286	803	4157		6441	9161	3426	2818		6451	3787	2015	1600
												6464	4588	12841	2211			6488	2491	3940	934							6471	3541	776	3940		6487	11878	7331	2581		6497	3787	2015	1600
												6510	4265	17759	2078			6534	2540	3829	906							6517	2738	718	3849		6533	14096	10653	2439		6543	3710	3309	1737
												6556	4031	23873	2196			6581	2507	3657	921							6563	2120	753	3498		6579	14683	8879	2338		6589	3425	4514	1794
												6602	4135	20877	2356			6627	2458	3585	992							6609	2120	753	3498		6625	14986	9971	2920		6635	3465	7511	2056
												6648	4009	25903	2404			6673	2162	3097	1092							6655	1939	672	3246		6671	14385	6685	3573		6681	3322	9183	2147
												6693	4144	23633	2401			6719	2230	3442	1035							6701	1895	345	3112		6717	14043	5125	3526		6727	3362	10397	2155
												6739	4249	25860	2412			6765	2306	3806	921							6746	1749	101	3432		6763	11994	4314	4104		6773	3693	7674	2291
												6785	4979	21477	2413			6811	2323	4164	833							6792	1607	11	3463		6809	11159	4750	4069		6819	4040	7215	2245
												6831	5489	17120	2464			6857	2273	4516	820							6838	1181	18	3787		6855	9421	3548	4918		6866	4414	7002	2057
												6877	5950	16494	2494			6903	2213	4868	862												6901	6890	2539	5784		6912	4872	9863	1969
												6923	6826	10382	2397			6949	2219	5253	920												6947	6140	2393	5930		6958	4747	10853	1865
												6969	7094	6473	2298			6995	2317	5759	978												6993	4587	1473	6659		7004	5296	15965	1903
												7014	8404	3181	2571			7041	2383	5090	969												7039	3980	927	6704		7050	6433	19243	2037
												7060	9374	3718	2865			7087	2530	5498	1005												7085	3870	746	6871		7096	7928	22719	2060
												7106	10458	6943	2986			7133	2682	6265	1001												7131	3471	332	6579		7142	9861	23875	2103
												7152	12703	16576	3279			7179	2811	7825	916												7177	2952	119	6110		7188	13594	13694	2227
												7198	13475	20723	3486			7225	2905	10505	818												7223	2952	119	6110		7234	15965	9835	2568
												7244	13383	23679	4388			7271	2968	14262	821												7269	2286	27	6089		7280	18757	2173	3438
												7289	11915	18456	5181			7317	3017	18641	956												7315	1613	51	6649		7326	19263	222	4067
												7335	11001	17641	5723			7363	2905	23222	1078												7361	1289	69	6662		7372	18108	0	5209
												7381	7327	8427	6858			7409	3062	27182	1277												7407	832	80	6848		7418	18108	0	5209
												7427	4974	3687	6970			7455	3412	29181	1393																	7465	14835	0	5727
												7473	2855	342	6181			7501	4002	28520	1409																	7511	11449	0	5448
												7519	2319	0	5464			7547	4820	25356	1388																	7557	7993	0	5190
												7565	2183	12	5607			7593	5778	20928	1401																	7603	4196	0	5045
												7610	2175	649	6495			7639	6725	17068	1433																	7649	2140	0	4785
												7656	2268	849	6801			7685	7341	19689	1532																	7695	814	27	4666
												7702	2082	1233	8402			7731	8099	19397	1544																	7741	391	59	4209
												7748	1774	1142	8338			7777	8623	19200	1638																	7787	368	174	4354
												7794	1524	1398	8875			7823	8854	18080	1858
												7840	1051	1212	8001			7869	8741	15693	2137
												7885	396	906	5801			7915	8291	12513	2363
												7931	64	388	3451			7961	7619	9377	2480
												7977	0	195	3074			8007	8547	5631	2700
												8023	3	0	2322			8053	7706	4196	2674
												8069	3	0	2322			8099	7023	3068	2460
												8115	54	14	2042			8145	6585	2042	2193
												8161	82	35	1950			8191	6363	1384	2075
												8206	78	66	2019			8237	6230	1434	2158
												8252	77	68	2294			8283	6021	2195	2324
												8298	77	68	2294			8329	5604	3282	2451
																		8375	4965	3165	2574
																		8421	4202	3415	2680
																		8467	3446	3083	2695
																		8513	2814	2340	2563
																		8559	2368	1516	2367
																		8605	2112	896	2228
																		8651	2002	572	2188
																		8697	1857	420	2201
																		8743	1839	453	2143
																		8789	1786	456	1952
[truncated: 10 more columns]

## Sheet: Tabelle3
Max value	control	Pio at membrane	Pio in,lumen	Pio membrane normalized to lumen				Max value	UAS-Cht2	Pio at membrane	Pio in,lumen	Pio membrane normalized to lumen			Max value		Pio at membrane	Pio in,lumen	Pio membrane normalized to lumen
1	hetero 162_profile 1	3873	9592	0.403774				1	btlG4-UAS-Cht2-1	2071	1795	1.15376			1	mega12_162_1	14156	15410	0.918624
2	hetero 162_profile 2	5951	17786	0.334589				2	btlG4-UAS-Cht2-2	2319	1609	1.44127			2	mega12_162_2	8909	5673	1.57042
3	hetero 162_profile 3	4670	14174	0.329477				3	btlG4-UAS-Cht2-3	23679	25061	0.944855			3	mega12_162_3	9996	8796	1.13643
4	hetero 162_profile 4	11124	29226	0.38062				4	btlG4-UAS-Cht2-2	29181	26666	1.09431			4	mega12_162_4	9494	10926	0.868936
5	hetero 162_profile 6	5894	11447	0.514895				5	btlG4-UAS-Cht2-3	33536	26955	1.24415			5	mega12_162_5	8707	7379	1.17997
6	hetero 162_profile 7	7397	16044	0.461045				6	btlG4-UAS-Cht2-4	23547	29569	0.796341			6	mega12_162_6	11473	17830	0.643466
7	hetero 161_profile 8	2375	8542	0.278038				7	btlG4-UAS-Cht2-5	32108	14208	2.25985			7	mega12_161_1	10451	10451	1
8	hetero 161_profile 3	4983	19462	0.256037				8	btlG4-UAS-Cht2-6	35024	20667	1.69468			8	mega12_161_2	12670	13048	0.97103
9	hetero 161_profile 4	3284	25822	0.127178				9	btlG4-UAS-Cht2-7	26394	16892	1.56251			9	mega12_161_3	13511	17629	0.766408
10	hetero 161_profile 5	7275	21728	0.334821				10	btlG4-UAS-Cht2-8	31432	29302	1.07269			10	mega12_161_4	9494	10926	0.868936
11	hetero 161_profile 6	4514	12591	0.35851				11	btlG4-UAS-Cht2-9	15468	17301	0.894052			11	mega12_161_5	9953	8556	1.16328
12	hetero 161_profile 7	4664	10578	0.440915				12	btlG4-UAS-Cht2-_2_1	14053	8554	1.64286				mega12_161_6	15012	20196	0.743316
	Mw			0.351658					Mw			1.28713			Mw				0.9
	stb			0.10278					stb			0.42746			stb				0.250462
	control								t-test			3.63121e-06			t-test				8.6836e-07
				Pio profile
				ratio pio membrane- lumen
Max value	control	Pio at membrane	Pio in,lumen	Pio membrane normalized to lumen				Max value	UAS-Cht2	Pio at membrane	Pio in,lumen	Pio membrane normalized to lumen			Max value		Pio at membrane	Pio in,lumen	Pio membrane normalized to lumen
1	hetero 162_profile 1	3873	9592	0.403774				1	btlG4-UAS-Cht2-1	2071	1795	1.15376			1	mega12_162_1	14156	15410	0.918624
2	hetero 162_profile 2	5951	17786	0.334589				2	btlG4-UAS-Cht2-2	2319	1609	1.44127			2	mega12_162_2	8909	5673	1.57042
3	hetero 162_profile 3	4670	14174	0.329477				3	btlG4-UAS-Cht2-3	23679	25061	0.944855			3	mega12_162_3	9996	8796	1.13643
4	hetero 162_profile 4	11124	29226	0.38062				4	btlG4-UAS-Cht2-2	29181	26666	1.09431			4	mega12_162_4	9494	10926	0.868936
5	hetero 162_profile 6	5894	11447	0.514895				5	btlG4-UAS-Cht2-3	33536	26955	1.24415			5	mega12_162_5	8707	7379	1.17997
6	hetero 162_profile 7	7397	16044	0.461045				6	btlG4-UAS-Cht2-4	23547	29569	0.796341			6	mega12_162_6	11473	17830	0.643466
7	hetero 161_profile 8	2375	8542	0.278038				7	btlG4-UAS-Cht2-5	32108	14208	2.25985			7	mega12_161_1	10451	10451	1
8	hetero 161_profile 3	4983	19462	0.256037				8	btlG4-UAS-Cht2-6	35024	20667	1.69468			8	mega12_161_2	12670	13048	0.97103
9	hetero 161_profile 4	3284	25822	0.127178				9	btlG4-UAS-Cht2-7	26394	16892	1.56251			9	mega12_161_3	13511	17629	0.766408
10	hetero 161_profile 5	7275	21728	0.334821				10	btlG4-UAS-Cht2-8	31432	29302	1.07269			10	mega12_161_4	9494	10926	0.868936
11	hetero 161_profile 6	4514	12591	0.35851				11	btlG4-UAS-Cht2-9	15468	17301	0.894052			11	mega12_161_5	9953	8556	1.16328
12	hetero 161_profile 7	4664	10578	0.440915				12	btlG4-UAS-Cht2-_2_1	14053	8554	1.64286				mega12_161_6	15012	20196	0.743316
	Mw			0.351658					Mw			1.28713			Mw				0.9
	stb			0.10278					stb			0.42746			stb				0.250462
	control								t-test			3.63121e-06			t-test				8.6836e-07
												Pio profile
												ratio pio membrane- lumen

## Sheet: Tabelle2
	mega 12_162_1						mega 12_162_2							mega 12_162_3					2					mega12_161_1					mega12_161_2					mega12_161_3					mega12_161_4					mega12_161_5					mega12_161_6
	Distance [µm]	Intensity ChA-T1	Intensity ChA-T2	Intensity ChA-T3			Distance [µm]	Intensity ChA-T1	Intensity ChA-T2	Intensity ChA-T3				Distance [µm]	Intensity ChA-T1	Intensity ChA-T2	Intensity ChA-T3		Distance [µm]	Intensity ChA-T1	Intensity ChA-T2	Intensity ChA-T3		Distance [µm]	Intensity ChA-T1	Intensity ChA-T2	Intensity ChA-T3		Distance [µm]	Intensity ChA-T1	Intensity ChA-T2	Intensity ChA-T3		Distance [µm]	Intensity ChA-T1	Intensity ChA-T2	Intensity ChA-T3		Distance [µm]	Intensity ChA-T1	Intensity ChA-T2	Intensity ChA-T3		Distance [µm]	Intensity ChA-T1	Intensity ChA-T2	Intensity ChA-T3		Distance [µm]
	0.000	411	241	417			0.000	809	184	443				0.000	1075	81	184		0.000	328	147	174		0.000	194	95	369		0.000	1757	123	465		0.000	1196	103	510		0.000	142	38	321		0.000	328	147	174		0.000
	0.046	742	277	468			0.046	1483	182	449				0.046	1200	93	216		0.046	423	114	192		0.046	212	131	416		0.046	3923	354	550		0.046	1196	103	510		0.046	154	47	336		0.046	423	114	192		0.046
	0.092	1006	282	506			0.092	2281	154	440				0.092	1320	106	216		0.092	452	101	188		0.092	169	64	447		0.092	5449	839	561		0.092	1413	100	487		0.092	157	41	361		0.092	452	101	188		0.092
	0.138	1154	263	479			0.138	3081	137	452				0.138	1371	110	230		0.138	1221	79	180		0.138	154	29	420		0.138	7299	1173	518		0.137	1669	112	497		0.138	141	58	356		0.138	1221	79	180		0.138
	0.184	1525	233	508			0.183	4433	157	503				0.185	1416	139	239		0.184	2019	71	167		0.184	139	38	402		0.184	7862	1044	459		0.183	2026	148	522		0.184	122	52	372		0.184	2019	71	167		0.184
	0.230	2190	220	511			0.229	4733	210	526				0.231	1479	153	241		0.231	4793	93	180		0.229	111	36	417		0.229	7641	1043	451		0.229	2527	188	540		0.230	36	49	364		0.231	4793	93	180		0.230
	0.276	3121	270	527			0.275	4709	287	515				0.277	1468	150	239		0.277	6863	168	193		0.275	91	48	391		0.275	7314	666	428		0.275	3158	203	538		0.275	0	70	370		0.277	6863	168	193		0.276
	0.321	4187	445	534			0.321	4463	385	490				0.323	1560	102	231		0.323	8772	178	202		0.321	0	70	370		0.321	6831	912	427		0.321	3828	198	514		0.321	0	125	330		0.323	8772	178	202		0.322
	0.367	4469	604	507			0.367	4137	462	489				0.369	1638	42	235		0.369	12703	637	210		0.367	0	123	379		0.367	6283	2291	450		0.367	4416	257	474		0.367	0	125	330		0.369	12703	637	210		0.368
	0.413	5652	1216	493			0.413	3780	543	504				0.415	2213	0	255		0.415	14558	1079	216		0.413	0	191	345		0.413	6299	4391	486		0.412	4845	571	436		0.413	0	143	328		0.415	14558	1079	216		0.414
	0.459	7225	3263	469			0.459	3633	610	519				0.461	2598	0	253		0.461	15397	2338	226		0.459	0	143	328		0.459	6920	7847	495		0.458	5147	1448	431		0.459	0	189	339		0.461	15397	2338	226		0.460
	0.505	8476	5944	516			0.504	3667	651	523				0.508	3276	94	262		0.507	15345	2790	234		0.505	165	105	326		0.505	7545	9240	474		0.504	5463	3238	479		0.505	588	154	313		0.507	15345	2790	234		0.506
	0.551	9143	6925	549			0.550	3628	598	479				0.554	4534	1996	255		0.553	12645	3864	265		0.551	588	154	313		0.551	8493	8644	524		0.550	5958	6071	567		0.551	1257	209	296		0.553	12645	3864	265		0.552
	0.597	9100	7032	532			0.596	3699	529	460				0.600	5389	3426	280		0.599	12645	3864	265		0.597	1037	87	312		0.596	8778	7312	562		0.596	6707	9494	645		0.597	2732	246	310		0.599	12645	3864	265		0.598
	0.643	9189	5460	468			0.642	3699	529	460				0.646	6145	7508	311		0.646	9659	3924	253		0.643	2451	135	342		0.642	8890	5450	607		0.642	7626	12395	663		0.643	3826	305	325		0.646	9659	3924	253		0.644
	0.689	9209	4411	456			0.688	3731	397	440				0.692	5908	9602	308		0.692	7535	2863	225		0.688	3373	253	345		0.688	8645	2560	695		0.687	8509	13511	610		0.689	4908	347	350		0.692	7535	2863	225		0.690
	0.735	8470	1880	413			0.734	3546	200	446				0.738	6195	9996	355		0.738	7078	1869	234		0.734	3998	205	355		0.734	8315	2034	736		0.733	9150	12311	526		0.735	5206	429	371		0.738	7078	1869	234		0.736
	0.781	7856	987	416			0.780	3670	100	433				0.784	5768	8366	386		0.784	5716	795	256		0.780	4955	205	352		0.780	7894	2131	961		0.779	8501	11227	541		0.780	5860	454	384		0.784	5716	795	256		0.782
	0.827	7121	632	421			0.825	4143	343	423				0.831	5733	5675	433		0.830	5304	409	292		0.826	5051	132	384		0.826	8098	2971	1177		0.825	8471	7969	558		0.826	5944	473	385		0.830	5304	409	292		0.828
	0.872	5454	349	461			0.871	5193	1336	430				0.877	5197	2149	464		0.876	4381	297	298		0.872	5121	249	396		0.872	7532	2194	1400		0.871	8365	5766	596		0.872	6065	486	386		0.876	4381	297	298		0.874
	0.918	4400	251	487			0.917	6924	3421	465				0.923	4805	1192	448		0.922	3960	240	327		0.918	4851	141	408		0.918	7985	2697	1834		0.917	8215	5109	604		0.918	6006	526	393		0.922	3960	240	327		0.920
	0.964	3319	272	464			0.963	8512	4712	540				0.969	4881	538	502		0.968	2856	265	365		0.964	5097	378	438		0.963	7870	2794	2620		0.962	7993	5481	578		0.964	6589	557	413		0.968	2856	265	365		0.966
	1010	3319	272	464			1009	10520	7190	596				1015	4889	453	606		1014	2235	313	403		1010	5574	537	482		1009	8492	3790	2986		1008	7645	5966	544		1010	7576	539	445		1014	2235	313	403		1012
	1056	3039	321	410			1055	12072	8822	641				1061	5303	537	747		1061	2198	321	413		1056	5946	753	498		1055	8909	7262	3492		1054	7160	5941	517		1056	8514	489	464		1061	2198	321	413		1058
	1102	3284	407	407			1101	12825	8909	673				1107	5472	647	912		1107	2029	360	446		1102	6900	1068	542		1101	9870	11065	3728		1100	6606	5366	495		1102	8559	533	449		1107	2029	360	446		1104
	1148	3338	385	408			1146	11084	4974	753				1154	5264	692	912		1153	2029	360	446		1147	7252	1295	537		1147	9870	11065	3728		1146	6122	4626	485		1148	9006	548	438		1153	2029	360	446		1150
	1194	3934	358	511			1192	10409	3585	747				1200	5208	655	1070		1199	1790	412	464		1193	7004	1410	512		1193	10604	12394	3833		1192	5852	4132	494		1194	8180	888	385		1199	1790	412	464		1196
	1240	3934	358	511			1238	9482	2215	732				1246	4463	617	1286		1245	1686	455	464		1239	6676	1459	482		1239	11036	12670	3886		1237	5883	3983	522		1239	7480	1137	361		1245	1686	455	464		1242
	1286	4373	299	583			1284	8509	1252	748				1292	3917	587	1439		1291	1442	520	501		1285	5525	1562	468		1285	10260	10265	4452		1283	6207	3931	573		1285	5426	1993	316		1291	1442	520	501		1288
	1332	4563	397	635			1330	6559	730	886				1338	3108	719	1622		1337	1454	513	522		1331	4579	1773	500		1331	9801	8802	5129		1329	6708	3635	666		1331	4719	2336	309		1337	1454	513	522		1334
	1378	4465	361	691			1376	6085	882	964				1384	2962	715	1650		1383	1387	419	583		1377	4503	1792	504		1376	8702	7050	6683		1375	7193	2947	816		1377	3795	2965	324		1383	1387	419	583		1380
	1424	4296	559	808			1422	5806	1230	1028				1430	2626	930	1732		1429	1292	369	607		1423	4040	2247	498		1422	8702	7050	6683		1421	7442	1993	1029		1423	3939	2912	336		1429	1292	369	607		1426
	1469	4490	1063	884			1467	5685	1639	1088				1477	2330	910	1818		1476	1284	345	602		1469	3999	2619	481		1468	7956	6141	8328		1467	7299	1035	1312		1469	4220	2743	340		1476	1284	345	602		1471
	1515	4164	703	959			1513	5725	2562	1180				1523	2211	1000	1804		1522	1167	332	603		1515	4101	2310	473		1514	8076	4834	9198		1512	6747	317	1659		1515	4829	2420	333		1522	1167	332	603		1517
	1561	4140	726	1196			1559	5943	2900	1226				1569	1989	457	1771		1568	1139	343	610		1561	4013	2626	464		1560	7696	3885	9729		1558	5928	0	2012		1561	6355	1491	326		1568	1139	343	610		1563
	1607	3905	421	1347			1605	5942	3082	1283				1615	1724	110	1647		1614	1090	402	655		1606	3936	2391	448		1606	7431	3556	9217		1604	5072	149	2291		1607	6945	1163	324		1614	1090	402	655		1609
	1653	4031	446	1736			1651	5698	3112	1361				1661	1724	110	1647		1660	1116	430	660		1652	4034	2127	493		1652	7283	4215	8756		1650	4696	1360	2449		1653	7967	666	363		1660	1116	430	660		1655
	1699	4390	796	1868			1697	5761	3628	1442				1707	1414	87	1599		1706	1066	471	704		1698	3823	2296	447		1698	7478	4506	8380		1696	4204	2746	2609		1699	8099	596	383		1706	1066	471	704		1701
	1745	4168	582	2018			1743	5317	3235	1475				1753	1241	211	1670		1752	1056	573	743		1744	3752	2640	429		1743	7098	5450	7941		1742	3901	4177	2842		1744	8029	711	431		1752	1056	573	743		1747
	1791	4269	819	2184			1789	5033	2613	1506				1800	953	422	2008		1798	1110	595	753		1790	3758	3666	476		1789	6985	6372	7610		1787	3725	5133	3235		1790	7666	1118	480		1798	1110	595	753		1793
	1837	4170	1035	2420			1834	5033	1913	1567				1846	787	604	2384		1844	1171	657	834		1836	3868	3201	455		1835	5906	5522	7704		1833	3609	5230	3844		1836	7374	1301	525		1844	1171	657	834		1839
	1883	4377	1630	2755			1880	4593	1448	1700				1892	787	604	2384		1891	1192	610	859		1882	4291	3260	520		1881	5325	4534	7689		1879	3502	4498	4657		1882	6778	2166	627		1891	1192	610	859		1885
	1929	4569	1559	2743			1926	4868	799	1843				1938	712	726	2575		1937	1276	630	931		1928	4896	2443	580		1927	4434	2913	7687		1925	3373	3434	5569		1928	5761	3187	878		1937	1276	630	931		1931
	1975	4523	2989	2998			1972	5245	396	2022				1984	687	1187	2571		1983	1276	630	931		1974	4875	1979	664		1973	4258	2371	7208		1971	3220	2708	6392		1974	4944	4448	1051		1983	1276	630	931		1977
	2020	4435	5725	3192			2018	5619	257	2238				2030	672	1389	2465		2029	1297	653	1031		2020	5412	1252	735		2019	4327	3067	6788		2016	3081	2711	6940		2020	4042	4382	1431		2029	1297	653	1031		2023
	2066	4126	9432	3601			2064	5023	570	2421				2076	697	1865	2399		2075	1242	681	1037		2065	5673	470	1058		2065	4347	2651	6656		2062	3024	3320	7127		2066	3357	4563	1702		2075	1242	681	1037		2069
	2112	3563	12388	3958			2110	5268	1033	2549				2123	697	1865	2399		2121	1088	704	1147		2111	5441	444	1272		2110	4602	3688	6270		2108	3093	4064	7018		2112	3004	4044	2232		2121	1088	704	1147		2115
	2158	3719	12266	4086			2155	5299	1529	2663				2169	761	2817	2432		2167	950	845	1215		2157	5605	491	1492		2156	4903	4365	6427		2154	3270	4525	6738		2158	2714	3711	2554		2167	950	845	1215		2161
	2204	3080	13627	4352			2201	5095	1882	2778				2215	751	2814	2500		2213	963	1049	1197		2203	5155	1374	1963		2202	4999	5920	6509		2200	3471	4584	6362		2204	2978	3976	2690		2213	963	1049	1197		2207
	2250	2582	11791	4449			2247	4324	2903	2988				2261	822	3321	2577		2259	955	1255	1258		2249	4392	3094	2410		2248	5014	6333	6713		2246	3598	4379	5919		2249	2816	3630	2930		2259	955	1255	1258		2253
	2296	2124	8041	4389			2293	4324	2903	2988				2307	837	3521	2780		2305	1005	1517	1248		2295	3841	3008	2536		2294	5054	7238	6629		2291	3599	4100	5504		2295	2806	3246	3008		2305	1005	1517	1248		2299
	2342	1739	5466	4388			2339	3911	2728	3145				2353	837	3521	2780		2352	1029	1962	1322		2341	3586	5425	2725		2340	5031	6972	6887		2337	3491	3834	5282		2341	2558	2863	2951		2352	1029	1962	1322		2345
	2388	1851	4419	4385			2385	3367	2573	3318				2399	886	4358	3170		2398	1028	1931	1288		2387	3062	7410	2890		2386	5287	6532	6945		2383	3336	3535	5335		2387	2356	2675	2884		2398	1028	1931	1288		2391
	2434	1634	2516	4470			2431	2792	2599	3484				2446	920	5064	3465		2444	982	1959	1361		2433	2821	6023	2811		2432	5048	4745	6985		2429	3206	3092	5569		2433	2173	2600	2927		2444	982	1959	1361		2437
	2480	1669	974	4643			2476	2282	3568	3642				2492	991	7256	3754		2490	933	2237	1436		2479	2962	7704	2894		2478	5029	2801	6975		2475	3160	2425	5823		2479	2308	3098	3119		2490	933	2237	1436		2483
	2526	1763	666	4938			2522	1940	3778	3755				2538	944	8588	3795		2536	933	2237	1436		2524	3200	6072	2744		2523	4854	1386	7433		2521	3096	2228	6320		2525	2428	2914	3252		2536	933	2237	1436		2529
	2572	1779	895	5111			2568	1822	3795	3910				2584	944	8588	3795		2582	882	3089	1500		2570	3580	3653	2591		2569	4854	1386	7433		2566	3194	1280	6411		2571	2687	4429	3240		2582	882	3089	1500		2575
	2617	1936	1497	5228			2614	1893	3588	4159				2630	815	8441	3687		2628	884	3612	1488		2616	3580	3653	2591		2615	4739	1242	8045		2612	3383	568	6545		2617	2950	4466	3384		2628	884	3612	1488		2621
	2663	1965	2314	5349			2660	1982	3148	4444				2676	745	8655	3475		2674	925	4826	1602		2662	3866	1795	2485		2661	4370	2185	8213		2658	3597	200	6779		2663	3255	4429	3526		2674	925	4826	1602		2667
	2709	2134	4317	5249			2706	2164	2645	4723				2722	720	8085	3221		2720	999	5147	1623		2708	3877	1562	2478		2707	4532	3050	8298		2704	3759	119	7114		2708	3735	6332	3632		2720	999	5147	1623		2713
	2755	2194	6053	4927			2752	2367	2288	5027				2769	785	8090	3013		2767	1049	5451	1739		2754	3809	2303	2532		2753	4455	4475	8194		2750	3819	204	7467		2754	3973	6118	3642		2767	1049	5451	1739		2759
	2801	2194	6053	4927			2797	2560	2073	5379				2815	785	8090	3013		2813	1149	5320	1854		2800	3599	3407	2655		2799	4672	5143	7649		2796	3772	413	7693		2800	3970	6554	3679		2813	1149	5320	1854		2805
	2847	2165	6552	4740			2843	2576	1794	5571				2861	852	8448	2820		2859	1190	5144	1854		2846	3230	6285	2973		2845	4672	5143	7649		2841	3654	815	7694		2846	3892	6128	3667		2859	1190	5144	1854		2851
	2893	2134	5437	4835			2889	2749	1989	5656				2907	878	8796	2727		2905	1045	5273	1988		2892	3017	7897	3373		2890	4786	5154	7087		2887	3520	1489	7498		2892	3394	4983	3738		2905	1045	5273	1988		2897
	2939	2115	4444	4922			2935	2895	2422	5648				2953	820	7347	2501		2951	972	5503	2007		2938	3017	7897	3373		2936	4591	4165	6734		2933	3425	2398	7248		2938	3394	4983	3738		2951	972	5503	2007		2943
	2985	2148	3175	5045			2981	2994	3089	5670				2999	757	5040	2360		2997	837	6332	2083		2983	2992	6798	3687		2982	4502	2982	6703		2979	3398	3355	7100		2984	2826	3218	3750		2997	837	6332	2083		2989
	3031	2148	3175	5045			3027	3108	4418	5466				3045	729	3931	2351		3043	837	6332	2083		3029	2968	3964	3772		3028	4011	1747	6522		3025	3434	4108	7115		3030	2599	2855	3718		3043	837	6332	2083		3035
	3077	2198	2910	5014			3073	3161	5066	5563				3092	769	2996	2388		3089	869	7032	2049		3075	2741	2976	3652		3074	3981	1655	6414		3071	3492	4485	7212		3076	2401	1927	3734		3089	869	7032	2049		3081
	3123	2246	3208	5161			3118	3202	5152	5513				3138	745	2332	2444		3135	941	7379	1982		3121	2825	1505	3692		3120	3737	2520	6437		3116	3519	4481	7249		3122	2508	1823	3861		3135	941	7379	1982		3127
	3168	2157	2628	5481			3164	3273	4645	5308				3184	838	1691	2593		3182	1042	7491	1998		3167	2651	459	3614		3166	3860	3346	6431		3162	3483	4221	7164		3168	2658	1382	4361		3182	1042	7491	1998		3173
	3214	2128	2076	6216			3210	3367	3925	5045				3230	958	1351	2650		3228	1112	7123	2023		3213	2572	514	3791		3212	3963	4987	6662		3208	3396	3846	7026		3213	2814	1187	4665		3228	1112	7123	2023		3219
	3260	2128	2076	6216			3256	3453	3464	4817				3276	947	1061	2605		3274	1138	6557	1978		3259	2572	514	3791		3257	4234	4896	6994		3254	3307	3423	6941		3259	2612	711	4936		3274	1138	6557	1978		3265
	3306	1989	1336	6972			3302	3542	3333	4615				3322	1008	1024	2628		3320	1147	6400	2068		3305	2598	925	4201		3303	4457	3849	7322		3300	3273	2958	6927		3305	2612	711	4936		3320	1147	6400	2068		3311
	3352	1816	701	7328			3348	3601	3311	4453				3368	975	851	2537		3366	1136	5641	2049		3351	2610	1219	4377		3349	4734	2324	7302		3346	2850	2095	7090		3351	2275	594	4902		3366	1136	5641	2049		3357
	3398	1877	544	7094			3394	3447	4207	4365				3415	915	895	2401		3412	1174	4967	2155		3397	2610	1219	4377		3395	4566	2272	7233		3391	2892	1591	6890		3397	2311	798	4894		3412	1174	4967	2155		3403
	3444	1868	341	6798			3439	3350	3602	4352				3461	876	916	2334		3458	1186	4346	2143		3442	2495	1486	4154		3441	4520	1769	6892		3437	3036	1205	6535		3443	2165	1521	4785		3458	1186	4346	2143		3449
	3490	1868	341	6798			3485	3238	2706	4379				3507	921	869	2323		3504	1298	3962	2286		3488	2289	1952	3936		3487	4436	1411	6924		3483	3252	1005	6126		3489	2223	2180	4784		3504	1298	3962	2286		3495
	3536	2045	231	6506			3531	3162	1889	4369				3553	946	827	2414		3550	1381	3047	2485		3534	2113	2456	3922		3533	4210	2381	6871		3529	3506	1029	5827		3535	2198	3051	4661		3550	1381	3047	2485		3541
	3582	2387	232	6327			3577	2881	1508	4177				3599	1042	817	2432		3597	1381	3047	2485		3580	2113	2456	3922		3579	3963	2337	7089		3575	3767	1256	5747		3581	2160	3430	4655		3597	1381	3047	2485		3587
	3628	2597	501	6147			3623	2933	1200	4028				3645	1184	1080	2461		3643	1376	1718	2611		3626	2062	2604	3938		3625	3781	3249	7074		3621	4009	1585	5835		3627	2023	3040	4607		3643	1376	1718	2611		3633
	3674	2731	1350	5713			3669	3053	1197	3909				3691	1244	1561	2422		3689	1313	945	2555		3672	2170	2159	3986		3670	3518	3223	7331		3666	4212	1865	5939		3673	2023	3040	4607		3689	1313	945	2555		3679
	3719	2592	1651	5589			3715	3224	1328	3846				3738	1247	1451	2353		3735	1223	276	2563		3718	2170	2159	3986		3716	3686	4202	7225		3712	4362	1956	5992		3718	1772	2044	4588		3735	1223	276	2563		3725
	3765	2592	2426	5341			3760	3102	805	3872				3784	1237	2029	2361		3781	1229	130	2499		3764	2358	1304	4076		3762	3474	3907	7387		3758	4436	1790	6053		3764	1718	1601	4685		3781	1229	130	2499		3771
	3811	2417	3197	5347			3806	3401	734	3906				3830	1266	1661	2273		3827	1309	289	2425		3810	2487	638	3965		3808	3599	4097	7484		3804	4407	1428	6186		3810	1612	1047	4515		3827	1309	289	2425		3817
	3857	2387	3721	5318			3852	3687	722	3981				3876	1348	1701	2149		3873	1380	431	2383		3856	2509	633	3701		3854	3935	3855	7933		3850	4261	1102	6323		3856	1780	1235	4687		3873	1380	431	2383		3863
	3903	2533	4401	5764			3898	3687	722	3981				3922	1466	1435	1952		3919	1468	761	2257		3901	2509	633	3701		3900	3980	2759	8424		3895	4009	1150	6325		3902	1702	1695	4716		3919	1468	761	2257		3909
	3949	2669	4337	6319			3944	3874	429	4123				3968	1601	1198	1851		3965	1622	1245	2076		3947	2455	1052	3541		3946	4358	2346	9486		3941	3699	1803	6140		3948	1769	2059	4955		3965	1622	1245	2076		3955
	3995	2870	5403	6311			3990	4121	475	4216				4014	1635	913	1742		4012	1684	1534	1993		3993	2353	1335	3556		3992	4358	2346	9486		3987	3387	2953	5877		3994	1499	2237	5030		4012	1684	1534	1993		4001
	4041	3060	6515	6609			4036	4178	472	4310				4061	1808	760	1656		4058	1770	1718	1904		4039	2353	1335	3556		4037	4416	2501	9907		4033	3126	4173	5708		4040	1499	2237	5030		4058	1770	1718	1904		4047
	4087	3098	7247	6444			4081	4073	491	4440				4107	2113	372	1429		4104	1754	1654	1880		4085	2213	1365	3789		4083	4220	3479	9396		4079	2956	5015	5699		4086	1218	2244	5183		4104	1754	1654	1880		4093
	4133	2689	7019	6290			4127	3893	646	4631				4153	2344	527	1134		4150	1740	1706	1847		4131	2007	1403	4191		4129	3810	6276	8840		4125	2909	5354	5768		4132	1232	1961	5361		4150	1740	1706	1847		4139
	4179	2303	6280	6152			4173	4265	961	4804				4199	2421	644	1008		4196	1686	1458	1834		4177	2007	1403	4191		4175	3488	8554	8191		4170	3007	5452	5802		4177	1238	1771	5456		4196	1686	1458	1834		4185
	4225	2129	5597	6031			4219	4222	1558	4981				4245	2542	1232	840		4242	1613	1112	1803		4223	1764	1663	4723		4221	3044	9783	7808		4216	3148	7046	5903		4223	1541	1820	5472		4242	1613	1112	1803		4231
	4271	1756	3571	5893			4265	4201	2313	5120				4291	2542	1232	840		4288	1647	685	1779		4269	1645	2396	5299		4267	3044	9783	7808		4262	3369	8147	5867		4269	1889	2133	5578		4288	1647	685	1779		4277
	4316	1740	3189	6078			4311	4162	3106	5208				4337	2935	1401	775		4334	1704	362	1823		4315	1736	3942	5684		4313	2977	8820	7471		4308	3591	9405	5767		4315	2219	2894	5621		4334	1704	362	1823		4322
	4362	1671	2284	6040			4357	4398	3489	5218				4384	3561	1056	730		4380	1888	313	1649		4360	1736	3942	5684		4359	3469	6707	7291		4354	3756	10388	5608		4361	2364	3655	5955		4380	1888	313	1649		4368
	4408	1564	1489	5847			4402	4152	4052	5245				4430	3978	949	668		4427	1888	313	1649		4406	1898	6047	6059		4404	3755	5101	7152		4400	3843	10703	5431		4407	2364	3655	5955		4427	1888	313	1649		4414
	4454	1682	2527	6045			4448	3801	4478	5299				4476	4636	548	541		4473	2144	552	1542		4452	1957	7391	6445		4450	4432	4253	7470		4445	3863	10282	5337		4453	2307	4020	6292		4473	2144	552	1542		4460
	4500	1756	3721	6093			4494	3366	4774	5415				4522	4636	548	541		4519	2288	683	1520		4498	1957	7391	6445		4496	4419	4657	7256		4491	3836	9505	5419		4499	2312	4291	6363		4519	2288	683	1520		4506
	4546	1843	5773	6200			4540	3091	4622	5583				4568	5438	478	418		4565	2564	837	1520		4544	1886	6906	6557		4542	4558	4697	7395		4537	3784	9059	5687		4545	2225	4390	6356		4565	2564	837	1520		4552
	4592	1843	5773	6200			4586	2788	4593	5594				4614	6511	610	359		4611	2898	641	1448		4590	1818	5292	6854		4588	4171	6036	6918		4583	3733	9579	6064		4591	2206	4161	6243		4611	2898	641	1448		4598
	4638	1969	8799	6365			4632	2646	4531	5653				4660	6845	731	337		4657	3567	554	1386		4636	1889	4053	7444		4634	3608	7217	6241		4629	3704	11277	6457		4637	2182	3819	6180		4657	3567	554	1386		4644
	4684	2139	11036	6261			4678	2636	4544	5808				4707	7269	755	317		4703	3576	240	1362		4682	1889	4053	7444		4680	3158	7768	5854		4675	3703	13764	6799		4682	2271	4464	6212		4703	3576	240	1362		4690
	4730	2376	14044	6493			4723	2404	5479	5957				4753	7269	755	317		4749	4811	197	1303		4728	1986	3627	7633		4726	2867	6129	5593		4720	3715	16180	7052		4728	2205	4871	6141		4749	4811	197	1303		4736
	4776	2559	15410	6704			4769	2194	5673	5857				4799	6841	608	285		4795	7165	567	1207		4774	1908	3427	7375		4772	2720	3426	5657		4766	3723	17629	7229		4774	2334	5237	6280		4795	7165	567	1207		4782
	4822	2559	15410	6704			4815	1847	5533	5606				4845	5601	386	242		4842	9681	1802	1163		4819	1908	3427	7375		4817	2720	3426	5657		4812	3727	17682	7416		4820	2230	5566	6176		4842	9681	1802	1163		4828
	4867	2620	14733	6737			4861	1397	4927	5371				4891	4364	324	219		4888	13476	4453	1145		4865	1753	3142	6892		4863	2620	1599	5895		4858	3739	16611	7702		4866	2232	5257	6270		4888	13476	4453	1145		4874
	4913	2562	13448	6838			4907	549	4193	5143				4937	2924	149	170		4934	15562	7092	1186		4911	1791	3084	6473		4909	2480	1590	5934		4904	3764	15122	8063		4912	2142	5044	6124		4934	15562	7092	1186		4920
	4959	2627	11845	6667			4953	244	3022	5160				4983	2924	149	170		4980	16368	7406	1220		4957	1887	3165	6447		4955	2508	2206	5961		4950	3786	13787	8349		4958	2170	4089	6124		4980	16368	7406	1220		4966
	5005	2742	11306	6629			4999	101	2371	5164				5030	1910	52	141		5026	16643	8507	1275		5003	2050	3374	6573		5001	2538	3540	5928		4995	3778	12666	8414		5004	2144	3440	5911		5026	16643	8507	1275		5012
	5051	2742	11306	6629			5045	133	2312	5091				5076	1389	15	121		5072	14931	8707	1211		5049	2327	3614	6745		5047	2610	4595	5929		5041	3727	11428	8256		5050	2314	3029	5916		5072	14931	8707	1211		5058
	5097	2771	12251	6558			5090	451	2193	4982				5122	1220	6	119		5118	10891	5444	1023		5095	2453	3532	6414		5093	2610	4595	5929		5087	3682	9391	7668		5096	2447	2823	5947		5118	10891	5444	1023		5104
	5143	2625	12220	6489			5136	715	2554	4794				5168	1196	27	115		5164	7681	3607	851		5141	2453	3532	6414		5139	2581	5674	6051		5133	3618	7682	7474		5142	2577	3119	6099		5164	7681	3607	851		5150
	5189	2471	14281	6546			5182	941	2829	4655				5214	1196	27	115		5210	4050	1206	595		5187	2427	3527	5986		5184	2590	6303	6175		5179	3580	6043	7475		5187	2790	3717	6188		5210	4050	1206	595		5196
	5235	2345	15017	6530			5228	1066	2899	4550				5260	1194	56	128		5257	4050	1206	595		5233	2410	4489	6042		5230	2560	7429	6264		5225	3592	4907	7636		5233	3092	5220	6228		5257	4050	1206	595		5242
	5281	2345	15017	6530			5274	1008	2157	4544				5306	1087	67	145		5303	2118	451	450		5278	2261	5451	6439		5276	2806	8642	6372		5270	3653	4432	7777		5279	3214	6895	6125		5303	2118	451	450		5288
	5327	2288	13116	6311			5320	789	1942	4402				5353	949	65	128		5349	1683	366	401		5324	2600	6645	6592		5322	3302	8015	6472		5316	3733	4400	7737		5325	3168	8433	6080		5349	1683	366	401		5334
	5373	2189	9411	6017			5366	526	1907	4315				5399	744	66	129							5370	3027	8742	7296		5368	3965	6843	6658		5362	3781	4417	7521		5371	3051	9785	6019							5380
	5419	2082	6865	5847			5411	308	2266	4314				5445	744	66	129							5416	3456	9182	7809		5414	3965	6843	6658		5408	3762	4260	7254		5417	2785	10002	5994							5426
	5464	1901	4304	5592			5457	82	2203	4463				5491	599	52	128							5462	3456	9182	7809		5460	4658	4082	6687		5454	3685	4100	7033		5463	2726	10005	6136							5472
	5510	1901	4304	5592			5503	131	2816	4414				5537	533	42	123							5508	3540	7735	7810		5506	4968	1964	6385		5499	3617	4402	6902		5509	2663	9959	6089							5518
	5556	1773	3820	5630			5549	131	2816	4414				5583	528	43	119							5554	3185	6067	7391		5551	5313	591	6017		5545	3643	5532	6897		5555	2743	9575	6415							5564
	5602	1769	4396	5809			5595	384	3233	4330				5629	461	52	118							5600	2912	5719	7292		5597	5189	1111	5674		5591	3816	7344	7024		5601	2840	10144	6933							5610
	5648	1871	3564	5766			5641	747	2373	4281				5676	440	53	120							5646	2690	6609	7107		5643	4894	1890	5575		5637	4110	9126	7189		5646	2871	10443	7446							5656
	5694	1878	3117	5676			5687	1398	2501	4144				5722	390	51	129							5692	2497	9703	7149		5689	4714	2183	5752		5683	4430	10012	7250		5692	2676	10926	7640							5702
	5740	1878	3117	5676			5732	2266	2549	4088				5767	2140	44	166							5737	2815	10290	7354		5735	4264	2647	5831		5729	4662	9553	7150		5738	2465	10404	7599							5748
	5786	1833	2019	5576			5778	3252	2527	4178				5813	1929	65	151							5783	2809	12422	7191		5781	3648	2632	6345		5774	4733	7993	6950		5784	2023	8958	7201							5794
	5832	1775	1341	5583			5824	4198	2444	4373				5859	1701	82	136							5829	3411	11789	7097		5827	3417	1948	6532		5820	4647	6021	6731		5830	1805	6919	6894							5840
	5878	1811	1075	5606			5870	5274	1574	4415				5906	1498	87	153							5875	3850	8364	6984		5873	3278	1105	6970		5866	4466	4267	6532		5876	1776	6923	6974							5886
	5924	1763	1688	5824			5916	5809	1487	4470				5952	1157	59	152							5921	4255	6170	6881		5919	3328	793	6966		5912	3817	2796	6560		5922	1656	4965	6703							5932
	5970	1723	2732	5856			5962	5979	1377	4439				5998	898	65	161							5967	3905	5731	6684		5964	3389	1113	6936		5958	3530	1802	6358		5968	1749	4241	6355							5978
	6015	1796	2990	6161			6008	5846	1315	4391				6044	772	54	153							6013	3783	6875	6132		6010	3492	1364	6775		6004	3209	1226	6230		6014	1629	4239	5912							6024
	6061	2004	4711	6487			6053	5560	1375	4389				6090	574	67	159							6059	4022	10072	5880		6056	3557	3312	6475		6049	2889	1088	6174		6060	1772	6054	5447							6070
	6107	2121	5756	6599			6099	5023	1701	4476														6105	3805	10889	5748		6102	3540	3885	6323		6095	2636	1410	6183		6106	1630	6378	5372							6116
	6153	2447	7367	6289			6145	4469	2051	4653														6151	4033	13485	5675		6148	3438	7045	6583		6141	2513	2052	6244		6151	1813	6462	5549							6162
	6199	2638	6832	6068			6191	3997	2251	4832														6196	4226	11806	5655		6194	3426	10313	7075		6187	2538	2681	6329		6197	1810	5076	5897							6208
	6245	2708	7556	5852			6237	3254	1659	4977														6242	4398	10149	5518		6240	3426	10313	7075		6233	2687	2928	6422		6243	1999	4621	6047							6254
	6291	2797	6871	5529			6283	3163	1160	4990														6288	4126	7645	5669		6286	3628	12576	7289		6279	2927	2623	6520		6289	2066	3177	6400
	6337	2677	6564	5543			6329	3345	720	5005														6334	3793	4334	5717		6331	3751	12793	7310		6324	3243	1889	6585		6335	2397	1642	6862
	6383	2656	6157	5372			6374	3713	563	5056														6380	3773	2750	5872		6377	4050	13048	6917		6370	3622	1042	6527		6381	2603	1474	7095
	6429	2349	5165	5448			6420	3798	1096	5062														6426	3559	2560	5692		6423	3966	12696	6538		6416	4018	372	6304		6427	3161	1668	7832
	6475	2091	4480	5729			6466	4118	1751	5224														6472	3569	1277	5577		6469	4078	10128	6028		6462	4345	14	5999		6473	3369	2105	8184
	6521	1838	3098	6316			6512	4277	2317	5459														6518	3601	290	5314		6515	4078	10128	6028		6508	4526	0	5778		6519	3896	2850	8538
	6567	1703	2490	6832			6558	4318	2603	5648														6564	3601	290	5314		6561	4009	6950	5590		6554	4551	195	5780		6565	3907	3098	8514
	6612	1750	2419	7080			6604	4043	3544	5522														6610	3372	0	5118		6607	3760	4495	5245		6599	4487	754	6047		6611	3907	3098	8514
	6658	1773	2412	7535			6650	3982	3066	5508														6655	2868	222	5098		6653	3409	2869	4962		6645	4426	1701	6501		6656	4108	3204	8005
	6704	1793	2094	7760			6695	3854	2584	5468														6701	2748	314	5162		6698	3468	2358	4701		6691	4415	2963	6979		6702	3929	3151	7399
	6750	1743	1839	7451			6741	3654	2305	5407														6747	2352	689	4898		6744	3571	2068	4429		6737	4418	4246	7327		6748	3691	2373	6351
	6796	1647	1448	7193			6787	3112	2260	5181														6793	2106	1131	4542		6790	4105	2167	4070		6783	4160	3120	7159		6794	3409	2144	6033
	6842	1647	1448	7193			6833	3056	2403	5124														6839	2309	1194	4547		6836	4105	2167	4070		6829	4049	3590	7162		6840	2963	1219	5817
	6888	1705	1270	7261			6879	3139	2532	5159														6885	2213	1273	4259		6882	4660	1590	3623		6874	3785	3925	7122		6886	2736	1360	5964
	6934	1821	2088	7160			6925	3315	2556	5264														6931	2593	1025	4088		6928	4729	893	3533		6920	3444	4153	7041		6932	2385	1430	5989
	6980	2193	2369	7223			6971	3617	2548	5552														6977	3124	624	4096		6974	5082	151	2891		6966	3144	4194	6974		6978	2385	1430	5989
	7026	2484	2559	7216			7016	3770	2223	5672														7023	3326	393	4082		7020	5106	0	2687		7012	2965	3899	7011		7024	2248	1998	5881
	7072	2484	2559	7216			7062	3808	1802	5771														7069	3617	398	4104		7066	5164	9	1912		7058	2918	3228	7141		7070	2263	2619	5950
	7118	2565	3046	7378			7108	3746	1408	5883														7114	3865	566	3994		7111	5003	131	1508		7104	2948	2369	7248		7115	2376	2636	6052
	7163	2418	4815	7403			7154	3766	1376	5957														7160	3706	668	3834		7157	5001	207	1314		7149	2992	1646	7265		7161	2306	2557	6069
	7209	2366	6256	7195			7200	3546	1010	5975														7206	3866	1200	3964		7203	4630	310	967		7195	3019	1292	7239		7207	2204	2225	6221
	7255	2456	7456	6760			7246	3364	874	6050														7252	3839	2090	4013		7249	4597	455	903		7241	3036	1289	7236		7253	1966	2417	6364
	7301	2456	7456	6760			7292	3293	956	6203														7298	3878	2648	4041		7295	4061	364	714		7287	3072	1445	7260		7299	1905	3480	6873
	7347	2650	6978	6590			7337	3351	1163	6391														7344	3808	2594	4117		7341	4097	434	634		7333	3146	1620	7294		7345	1905	3480	6873
	7393	2623	6450	6421			7383	3372	882	6416														7390	3802	2543	4070		7387	3570	183	570		7378	3259	1874	7331		7391	2075	4884	7386
	7439	2872	4117	5991			7429	3581	1015	6533														7436	3481	2600	3996		7433	3684	122	510		7424	3388	2357	7362		7437	2187	6104	7712
	7485	3013	2658	5450			7475	3809	1194	6529														7482	3316	3350	3849		7478	3399	0	471		7470	3507	3057	7366		7483	2508	6325	7951
	7531	3013	2658	5450			7521	4016	1412	6428														7528	3072	4155	3738		7524	3667	17	447		7516	3598	3680	7325		7529	2756	6899	7964
	7577	2923	2448	4935			7567	4233	2370	6116														7573	2850	7057	3426		7570	3647	276	444		7562	3668	3839	7210		7575	2885	5404	7598
	7623	2701	2788	4483			7613	4256	2827	5884														7619	3004	9193	3307		7616	3727	809	443		7608	3944	2838	7035		7620	3082	5152	7318
	7669	2584	2669	4323			7658	4079	3186	5632														7665	3309	9962	3302		7662	3727	809	443		7653	4001	2512	6760		7666	2977	4905	6719
	7715	2711	2427	3880			7704	3763	3452	5369														7711	3509	8365	3324		7708	3761	1265	400		7699	4047	1984	6386		7712	3002	4865	6397
	7760	2711	2427	3880			7750	3593	3521	5200														7757	4181	5728	3430		7754	3851	1695	405		7745	4059	1419	6012		7758	2714	6548	6258
	7806	3176	1868	3545			7796	3513	3249	4839														7803	4538	4805	3493		7800	3766	1427	385		7791	4006	893	5673		7804	2667	6645	6044
	7852	3735	1244	3368			7842	3700	3027	4456														7849	4596	3243	3702		7845	3689	1597	400		7837	3885	437	5368		7850	2425	8157	5929
	7898	3776	818	3305			7888	4109	2850	4074														7895	4534	1664	3997		7891	3680	833	368		7883	3732	87	5123		7896	2502	6902	5914
	7944	3795	485	3185			7934	5028	1849	3548														7941	4598	1203	3859		7937	3680	833	368		7928	3608	0	4992		7942	2511	7173	5835
	7990	3795	485	3185			7979	5399	1614	3084														7987	4205	586	3808		7983	3848	236	367		7974	3555	0	5030		7988	2625	5350	5745
	8036	3411	360	2989			8025	5565	1347	2656														8032	3837	494	4029		8029	4061	0	391		8020	3577	269	5250		8034	2561	4818	5318
	8082	2854	446	2634			8071	5489	1058	2280														8078	3498	744	4244		8075	4228	0	443		8066	3651	984	5573		8080	2635	3524	4993
	8128	2568	783	2393			8117	5070	482	1825														8124	3248	1097	4330		8121	4298	0	463		8112	3769	2145	5824		8125	2475	3746	4829
	8174	2358	491	2222			8163	4761	320	1497														8170	3107	1329	4697		8167	4502	64	485		8158	3955	3665	5819		8171	2622	2779	4541
	8220	2200	659	1980			8209	4551	255	1189														8216	2742	1829	4869		8213	4399	97	454		8203	4253	5196	5479		8217	2848	2941	4151
	8266	2075	351	1592			8255	4565	332	932														8262	2422	2217	4732		8258	4681	175	476		8249	4705	6228	4884		8263	3136	3093	3874
	8311	2215	125	1202			8301	5106	896	731														8308	2475	2538	4627		8304	4785	364	493		8295	5321	6405	4220		8309	3448	4126	3462
	8357	2220	101	950			8346	5899	1622	638														8354	2736	2390	4633		8350	4904	525	514		8341	6068	5814	3672		8355	3512	3775	3153
	8403	2508	106	860			8392	6953	2397	568														8400	2978	3456	4576		8396	4699	838	536		8387	6876	4919	3314		8401	3489	3582	3003
	8449	2866	208	588			8438	8149	3041	515														8446	3753	5116	4558		8442	4582	836	554		8433	7632	4165	3061		8447	3283	3468	2941
	8495	2969	252	457			8484	9836	4538	493														8491	3969	5356	4646		8488	4599	763	524		8478	7667	2808	2675		8493	3334	3259	3067
	8541	3319	310	323			8530	10832	4740	477														8537	4456	5866	4709		8534	4686	707	503		8524	8031	2573	2248		8539	3064	4066	3120
	8587	3430	321	279			8576	11591	5492	476														8583	4718	5800	4707		8580	4921	576	501		8570	8069	2099	1711		8584	2807	4801	3417
	8633	3523	296	273			8622	12096	7205	493														8629	4684	3897	4841		8625	5396	418	486		8616	7775	1375	1204		8630	2644	5776	3595
	8679	3708	245	278			8667	12395	4825	531														8675	4442	2527	4843		8671	5685	341	483		8662	7243	613	831		8676	2608	5827	3804
	8725	3829	250	280			8713	12118	5651	542														8721	4509	2148	4675		8717	5965	207	428		8708	6645	62	603		8722	2742	4010	4074
	8771	4036	209	265			8759	11437	5754	537														8767	4475	1456	4335		8763	6067	147	402		8753	6182	0	479		8768	2991	2911	4130
	8817	4179	231	246			8805	11437	5754	537														8813	4309	858	4301		8809	5955	133	372		8799	6027	0	427		8814	3330	1376	3966
	8863	4132	189	213			8851	10311	1301	510														8859	4734	912	4175		8855	5967	126	369		8845	6269	0	424		8860	3330	1376	3966
	8908	4156	154	193			8897	9251	544	519														8905	5430	1484	4118		8901	5557	122	381		8891	6891	79	435		8906	3568	674	3584
	8954	4300	162	203			8943	8177	0	515														8950	5347	1019	4019		8947	4889	105	389		8937	7773	106	420		8952	3737	654	3216
	9000	4485	112	224			8988	7119	0	488														8996	5852	1378	3870		8992	4897	102	416		8983	8706	92	377		8998	3625	544	2441
	9046	4803	53	239			9034	6038	0	446														9042	6316	1614	3841		9038	4042	77	418		9028	9426	80	334		9044	3533	548	2028
	9092	4803	53	239			9080	4465	0	412														9088	6357	2360	3811		9084	4042	77	418		9074	9660	82	313		9089	3093	220	1617
	9138	5103	18	233			9126	3163	0	387														9134	6196	3251	3829		9130	3196	87	416		9120	9219	84	303		9135	2874	46	1467
	9184	5495	65	240			9172	1993	0	371														9180	6351	3743	3754		9176	3100	97	412		9166	8079	76	285		9181	2649	0	1233
	9230	5644	62	257			9218	1071	0	352														9226	6364	5504	3899		9222	2261	110	375		9212	6425	57	261		9227	2649	0	1233
	9276	5917	0	300			9264	314	0	376														9272	6317	6220	4170		9268	2016	116	347		9257	4588	33	241		9273	2718	884	919
	9322	5917	0	300			9309	89	0	401														9318	6041	7288	4324		9314	1425	139	404		9303	2908	21	232		9319	2612	1663	766
	9368	6700	0	315			9355	27	8	446														9364	5583	7683	4172		9360	1425	139	404		9349	1365	17	249		9365	2775	4740	522
	9414	7420	0	297			9401	36	36	482														9409	4677	6896	3715		9405	1068	144	449		9395	607	72	251		9411	2725	5167	465
	9459	9073	409	271			9447	76	40	484														9455	4343	6063	3303		9451	777	152	379		9441	220	172	260		9457	2980	6922	338
	9505	10928	2869	278			9493	85	77	476														9501	3920	5018	2927		9497	619	155	335		9487	82	300	273		9503	3119	6281	317
	9551	10928	2869	278			9539	106	99	452														9547	3711	3469	2133		9543	419	122	322		9532	86	412	281		9549	3330	5049	269
	9597	12618	7662	349			9585	141	102	417														9593	3778	4128	1770		9589	351	110	346		9578	149	455	281		9594	3330	5049	269
	9643	13217	10698	391																				9639	4281	4932	1311							9624	209	403	278		9640	3437	2781	264
	9689	13138	14156	443																				9685	4675	3513	1193							9670	230	282	282		9686	3689	1967	281
	9735	11005	12406	411																				9731	5171	2749	921							9716	208	159	296		9732	3948	656	318
	9781	11005	12406	411																				9777	5203	3317	763							9762	159	87	306		9778	4293	364	330
	9827	7274	6875	346																				9823	5392	1242	739							9807	106	70	302		9824	4635	374	352
	9873	3501	1954	319																				9868	5418	141	561												9870	4731	924	343
	9919	1646	453	301																				9914	5420	283	473												9916	4620	3310	354
	9965	1009	0	322																				9960	5303	0	413												9962	4620	3310	354
	10010	174	0	311																				10006	4960	0	345												10008	4524	6910	348
	10056	0	0	318																				10052	4472	0	328												10054	4652	8499	325
	10102	94	0	300																				10098	4183	265	329												10099	5326	9494	326
	10148	273	0	296																				10144	4156	272	339												10145	5931	7806	300
	10194	477	0	261																				10190	4115	1700	361												10191	6913	4856	276
																								10236	3789	3024	365												10237	7349	2574	255
																								10282	4089	4208	387												10283	7796	706	256
																								10327	3884	6138	428												10329	7796	706	256
																								10373	3741	5745	434												10375	8027	51	246
																								10419	3845	5285	414												10421	7796	0	238
																								10465	4110	3456	404												10467	7968	240	239
																								10511	5022	1247	385												10513	7463	332	250
																								10557	5595	659	357												10558	6876	448	254
																								10603	5933	224	358												10604	5592	480	243
																								10649	6364	33	373												10650	4195	512	257
																								10695	6397	42	426												10696	3851	364	250
																								10741	6397	42	426												10742	2489	341	260
																								10786	6475	170	466												10788	1192	163	242
																								10832	6985	864	492												10834	650	149	229
																								10878	7947	1826	503												10880	304	60	254
																								10924	7871	2892	472												10926	242	74	261
																								10970	8478	6517	485												10972	196	47	261
																								11016	8051	9997	532												11018	192	73	255
																								11062	8051	9997	532												11063	165	26	248
																								11108	6440	10451	501
																								11154	4189	7407	427
																								11200	2730	4605	400
																								11245	2082	3485	385
																								11291	662	1075	395
																								11337	157	438	401
																								11383	1	388	417
																								11429	0	524	393
																								11475	0	726	324
																								11521	0	848	292
																								11567	3	723	271
																								11613	73	620	270
																								11659	83	506	285
																								11704	91	532	276
																								11750	86	422	269
																								11796	75	273	278
																								11842	75	273	278
																								11888	62	143	291
																								11934	65	76	284
																								11980	79	42	290
																								12026	83	69	270
[truncated: 11 more columns]
