# Supplementary material for: The proteolysis of ZP proteins is essential to control cell membrane structure and integrity of developing tracheal tubes in Drosophila
Source: eLife journal article supplement (doi:10.7554/elife.91079), 2023-09-21
Supplement: fig3-data2 [file Figure 3 source data 3_statistsics wurst_pio airway gas filling.xlsx]

## Sheet: Tabelle1
	Gasfüllungsrate
Kreuzung	Normale Gasfüllung	Defekte Gasfüllung	STABW	T-Test	asterisks
w-	99.4702	1.14908	0.75
wurst/+;pio/+	11.6	88.4	12	0.00666	**
wurst;pio	0.1	100

## Sheet: wt
Gas Filling test for wildtype embryos
	Gas Filling test for wildtype embryos
		Positive (with proper gas filling)				Negative (With Defects/ or dead embryos)
		23				0
	Gas Filling test for wildtype embryos
		Positive (with proper gas filling)				Negative (With Defects/ or dead embryos)
		34				0
	Gas Filling test for wildtype embryos
		Positive (with proper gas filling)				Negative (With Defects/ or dead embryos)
		183				6
	Gas Filling test for wildtype embryos
		Positive (with proper gas filling)				Negative (With Defects/ or dead embryos)
		191				1
				wildtype	Proper gas filling	Not Ok	Total
				Test 1	23	0	23
				test 2	34	0	34
				Test 3	183	6	189
				Test 4	191	1	192
				Total	431	7	438
				%	98.4018	1.59817	100
				wildtype	Proper gas filling in %
				Test 1	100
				Test 2	100
				test 3	99.4792
				Test 4	98.4018
				Avg.	99.4702
				Std. Dev.	0.75341
Luise:
w-
	Mit	Ohne
2020-03-04	36 L1	-
2020-03-05	19 E(17), 5 L1	-
2020-03-10	4 E(17), 38 L1	-
2020-03-11	34 E(17), 22 L1, 4 L2	-
∑	162	0
w-
	Mit	Ohne
2020-06-03	183 L1	6 L1	1 tote
2020-06-04	191 L1	1 E(17)
∑	374	7

## Sheet: wurst,pio
		Gas Filling test for wildtype embryos
			Positive (with proper gas filling)				Negative (With Defects/ or dead embryos)
			1				9
		Gas Filling test for wildtype embryos
			Positive (with proper gas filling)				Negative (With Defects/ or dead embryos)
			0				2
		Gas Filling test for wildtype embryos
			Positive (with proper gas filling)				Negative (With Defects/ or dead embryos)
			1				3
						wildtype	Proper gas filling	Not Ok	Total			wildtype	Proper gas filling	Not Ok	Total
						Test 1	1	9	10			Test 1	23	0	23
						test 2	0	2	2			test 2	34	0	34
						Test 3	1	3	4			Test 3	183	6	189
						Test 4	0	0	0			Test 4	191	1	192
						Total	2	14	16			Total	431	7	438
						%	12.5	87.5	100			%	98.4018	1.59817	100
						Std dv	0.83666	5.77062
												wildtype	Proper gas filling in %
												Test 1	100
												Test 2	100
												test 3	99.4792
												Test 4	98.4018
						wurst,pio	filling in %	defect in %				Avg.	99.4702
						Test 1	10	90				Std. Dev.	0.75341
						Test 2	0	100
						test 3	25	75
						Test 4
						Avg.	11.6667	88.3333
						Std. Dev.	12.5831	12.5831
									T-test:	0.0066607
