# Supplementary material for: The proteolysis of ZP proteins is essential to control cell membrane structure and integrity of developing tracheal tubes in Drosophila
Source: eLife journal article supplement (doi:10.7554/elife.91079), 2023-09-21
Supplement: fig4-data3 [file Figure 4 source data 4_pio_ZA Junctions at tube fusion_statistsics.xlsx]

## Sheet: Tabelle1
junction ring like fusion cells	control	in µm	in µm						apical cell size	A=µmxµm	A=µm x µm
pio/+	control	pio	Np						control	pio	Np
	1.98	2.5	2.23						16.65	40.31	40.2
	1.98	2.84	1.9						18.47	31.28	36.36
	1.98	2.37	2.36						13.79	25.65	28.04
	2.07	2.28	2.3						16.59	27.85	27.57
	1.95	2.47	2.08						16.87	23.19	27.53
	1.92	2.63	2.49						20.13	26.02	24.71
	1.98	2.77	2.32						13.94	24.37	20.75
	1.72		2.76						12.22	26.15	35.14
	2		2.13						21.7	28.01	31.03
	1.7								12.3	32.13	24.61
	1.88								18.12	30.69	42.16
									15.51		34.84
	1.92364	2.55143	2.28556						19.43		26.11
	0.131448	0.21093	0.247998						20.32		39.15
		5.81976e-05	0.00203259						18.32		41.88
									15.38		35.84
			0.00224272						14.24		32.69
									14.2		32.83
									14.62		37.02
									14.63
									16.3715	28.6955	32.5505
									2.86834	4.80071	6.31017
										1.67297e-06	2.45401e-10
