# Supplementary material for: The proteolysis of ZP proteins is essential to control cell membrane structure and integrity of developing tracheal tubes in Drosophila
Source: eLife journal article supplement (doi:10.7554/elife.91079), 2023-09-21

**Figure 6A**

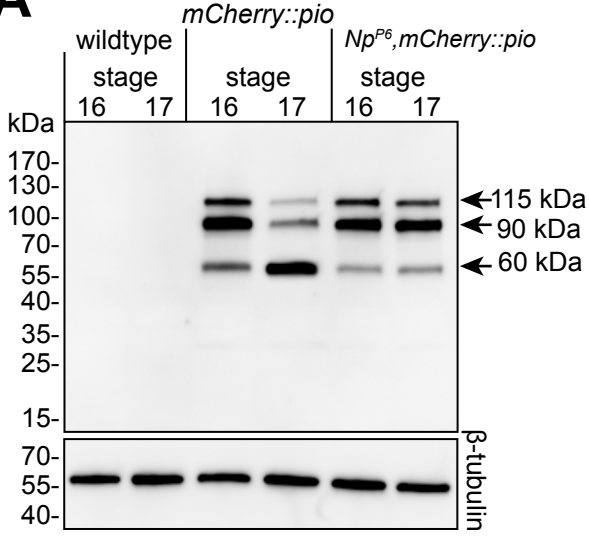

**Crops of original blots**

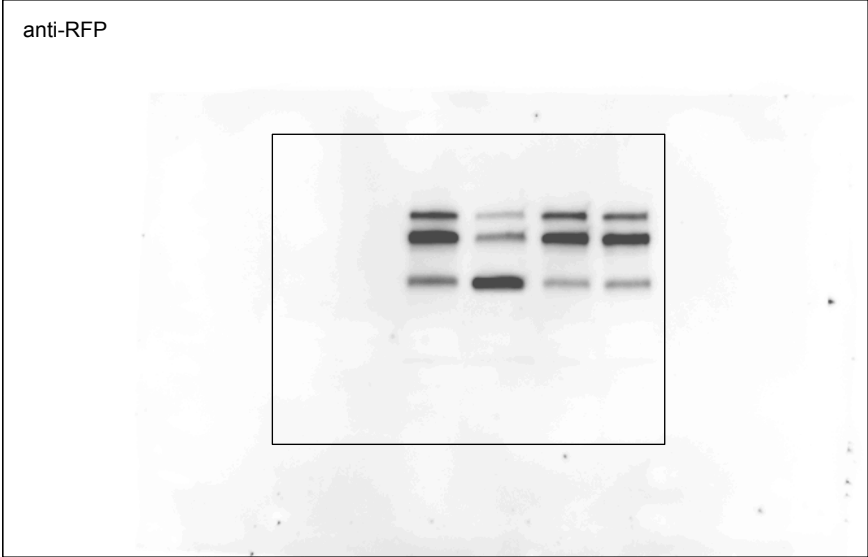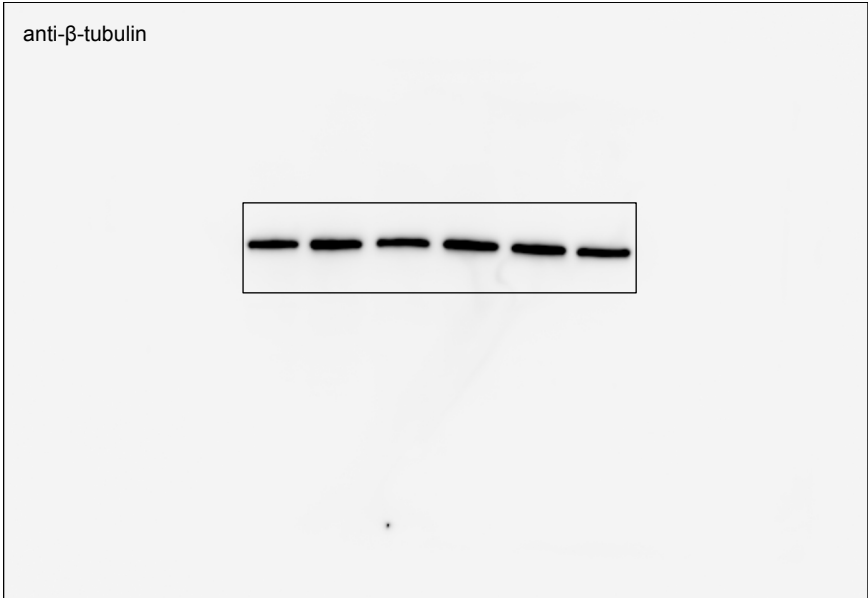

Supplement: fig6-data7 [file elife-91079-fig6-data7-v1.pdf]
