# Supplementary material for: The proteolysis of ZP proteins is essential to control cell membrane structure and integrity of developing tracheal tubes in Drosophila
Source: eLife journal article supplement (doi:10.7554/elife.91079), 2023-09-21

# Figure 6B

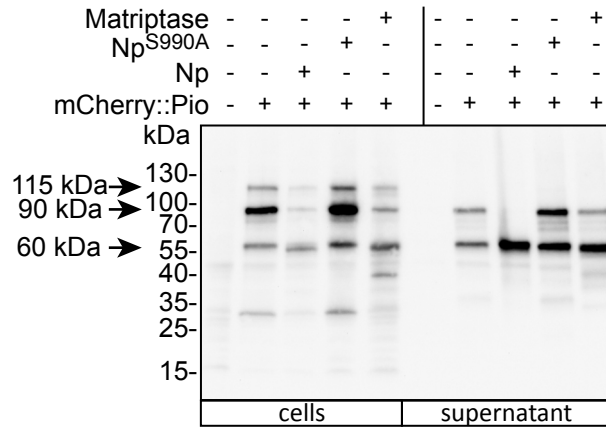

Crop of original blot

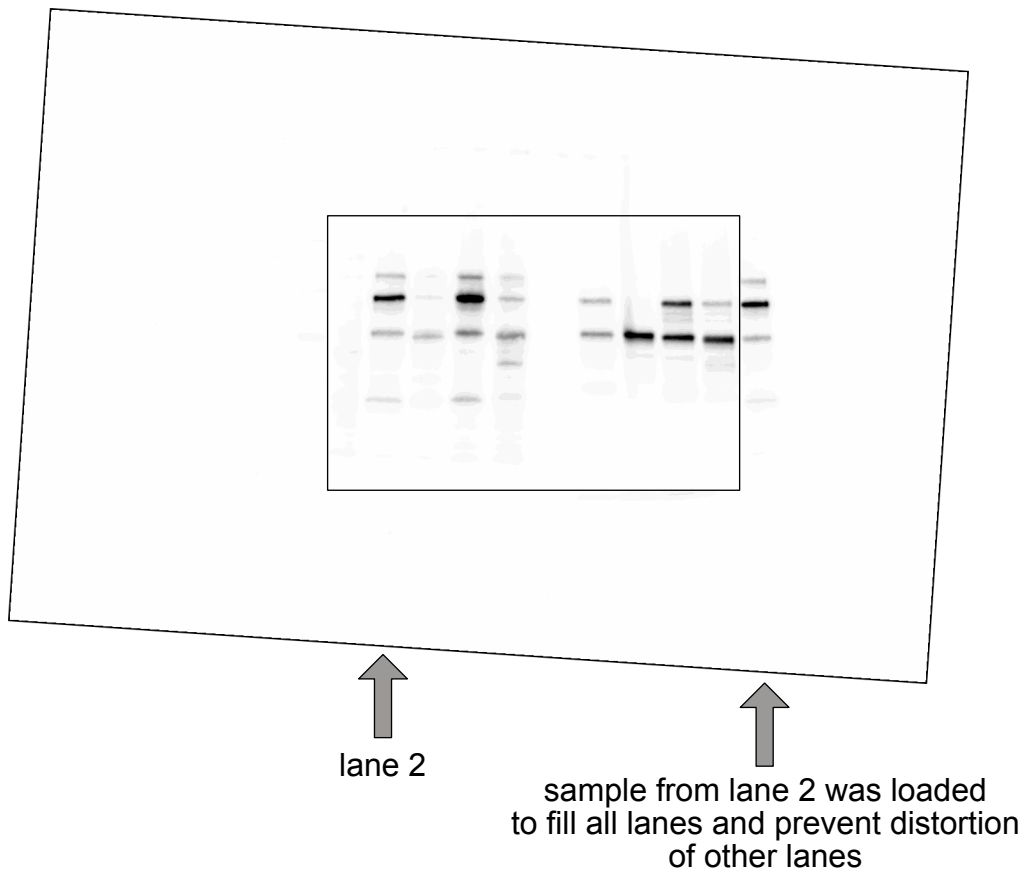

Supplement: fig6-data8 [file elife-91079-fig6-data8-v1.pdf]
