# Supplementary material for: The proteolysis of ZP proteins is essential to control cell membrane structure and integrity of developing tracheal tubes in Drosophila
Source: eLife journal article supplement (doi:10.7554/elife.91079), 2023-09-21
Supplement: fig7-data2 [file Figure7_source data2_BulgesPerDT.xlsx]

## Sheet: Sheet1
NpP6 embryo	Number of bulges per dorsal trunk
1	19
2	31
3	12
4	21
5	15
6	16
7	23
8	23
9	18
10	22
11	24
12	11
13	13
14	15
15	17
16	27
