# Supplementary material for: The proteolysis of ZP proteins is essential to control cell membrane structure and integrity of developing tracheal tubes in Drosophila
Source: eLife journal article supplement (doi:10.7554/elife.91079), 2023-09-21
Supplement: fig8-data1 [file Figure8_source data1_normalizedDTlength.xlsx]

## Sheet: Sheet1
Group	Embryo length	DT length	DT / Embryo
WT	461.2	371.2	0.804857
WT	422.8	306.7	0.725402
WT	431.8	352.8	0.817045
WT	435	334.1	0.768046
WT	419.7	324.2	0.772457
WT	428.1	343.8	0.803083
WT	441	352.9	0.800227
WT	398.5	312.5	0.784191
WT	418	330.2	0.789952
pio17C	442.6	391	0.883416
pio17C	435.4	391.2	0.898484
pio17C	438	391.3	0.893379
pio17C	382.7	339.1	0.886073
pio17C	413.9	348.4	0.841749
pio17C	445.1	401.1	0.901146
pio17C	412	342.4	0.831068
pio17C	434	372.8	0.858986
pio17C	458.2	401.1	0.875382
NpP6	412.4	314	0.761397
NpP6	426.1	340.5	0.799108
NpP6	425	321.5	0.756471
NpP6	417.4	279.6	0.669861
NpP6	419	300.4	0.716945
NpP6	443	337.3	0.7614
NpP6	392.5	272.5	0.694268
NpP6	414.1	293.5	0.708766
NpP6	423	313.8	0.741844
btlGal4>UAS-Np	449.2	386.2	0.859751
btlGal4>UAS-Np	453	380.5	0.839956
btlGal4>UAS-Np	415.8	352.8	0.848485
btlGal4>UAS-Np	424.8	378.4	0.890772
btlGal4>UAS-Np	429.1	358	0.834304
btlGal4>UAS-Np	440	387.6	0.880909
btlGal4>UAS-Np	437.5	376.2	0.859886
btlGal4>UAS-Np	433.8	368.2	0.848778
btlGal4>UAS-Np	413	352.2	0.852785
NpP6, pio17C	397.1	339.2	0.854193
NpP6, pio17C	405.1	379.4	0.936559
NpP6, pio17C	441.9	402.1	0.909934
NpP6, pio17C	416	361.4	0.86875
NpP6, pio17C	420	383.1	0.912143
NpP6, pio17C	392.4	330.8	0.843017
NpP6, pio17C	426.2	395.8	0.928672
NpP6, pio17C	416.1	382.7	0.919731
NpP6, pio17C	434	386.2	0.889862
